# Supplementary material for: Design, synthesis, and biological evaluation of 3,3′-diindolylmethane N-linked glycoconjugate as a leishmanial topoisomerase IB inhibitor with reduced cytotoxicity
Source: Royal Society of Chemistry journal article supplement (doi:10.1039/d3md00214d), 2023-01-01

**Design, Synthesis, and biological evaluation of 3,3'-diindolylmethane N-linked glycoconjugate as Leishmanial Topoisomerase IB inhibitor with reduced cytotoxicity**

**Parampreet Kour**<sup>1</sup>, **Pallavi Saha**<sup>2, a</sup>, **Srija Bhattacharya**<sup>3, a</sup>, **Diksha Kumari**<sup>1, 4</sup>, **Abhipsa Debnath**<sup>5</sup>, **Amit Roy**<sup>5</sup>, **Deepak K. Sharma**<sup>2</sup>, **Debaraj Mukherjee**<sup>3, 6, #</sup>, **Kuljit Singh**<sup>1, 4, #</sup>

<sup>1</sup>*Infectious Diseases Division, CSIR- Indian Institute of Integrative Medicine, Jammu, 180001, India*

<sup>2</sup>*Department of Pharmaceutical Engineering and Technology, Indian Institute of Technology Banaras Hindu University, Varanasi-221005, India*

<sup>3</sup>*Natural Products & Medicinal Chemistry Division, CSIR- Indian Institute of Integrative Medicine, Jammu, 180001, India*

<sup>4</sup>*Academy of Scientific and Innovative Research (AcSIR), Ghaziabad- 201002, India*

<sup>5</sup>*Department of Biotechnology, Savitribai Phule Pune University, Pune- 411007, India*

<sup>6</sup>*Department of Chemistry, Bose Institute, Kolkata, 700091, India*

<sup>a</sup> Equal Contribution

#To whom correspondence should be addressed:

Dr. Kuljit Singh, Infectious Diseases Division, CSIR- Indian Institute of Integrative Medicine, Canal Road, Jammu -180001, J&K, India. Email address: [singh.kuljit@iiim.res.in](mailto:singh.kuljit@iiim.res.in) (K.S.) Tel.: 91-191-2585006-13 Ext: 333.

Dr. Debaraj Mukherjee, Natural Products & Medicinal Chemistry Division, CSIR- Indian Institute of Integrative Medicine, Jammu, India-180001. E-mail: [debaraj@jcbose.ac.in](mailto:debaraj@jcbose.ac.in)

**Contents**

**Proton NMR, 13C and 19F NMR spectra of synthesized DIM derivatives.....2 - 30**

# NMR Spectra

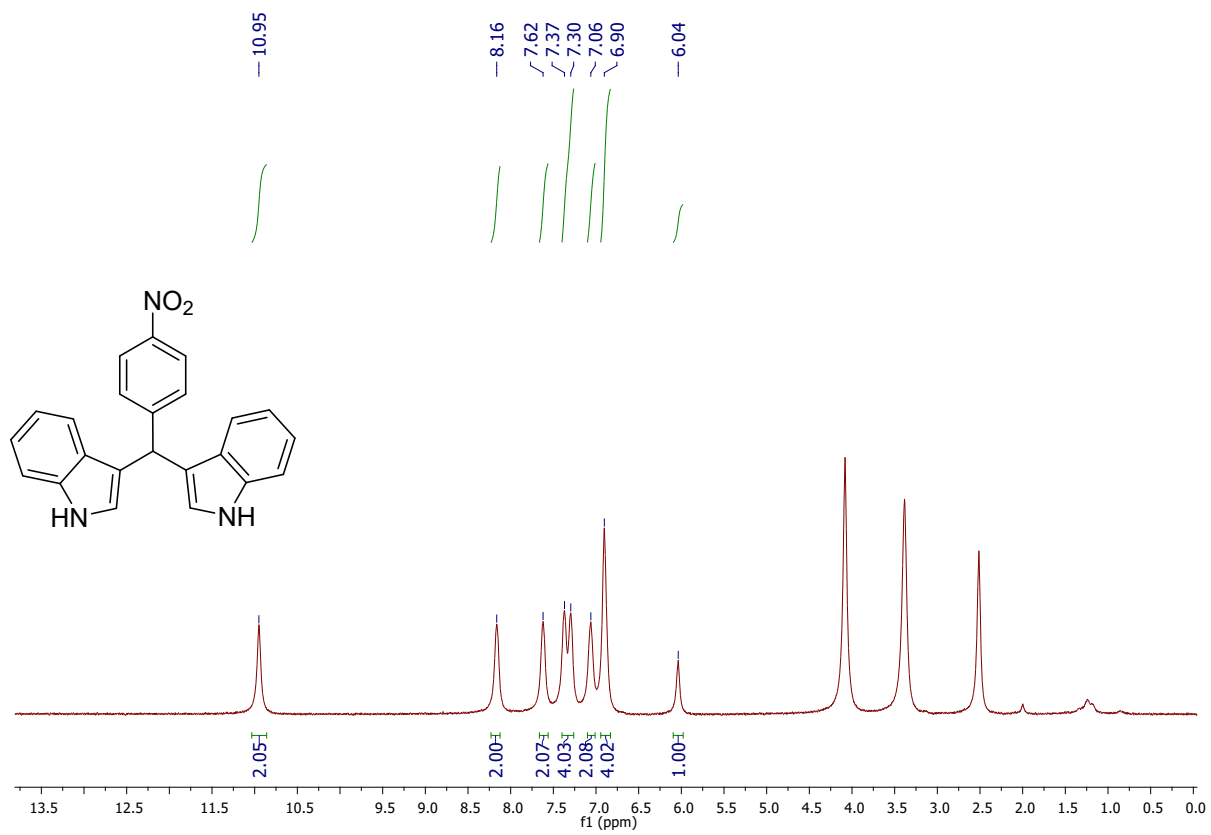

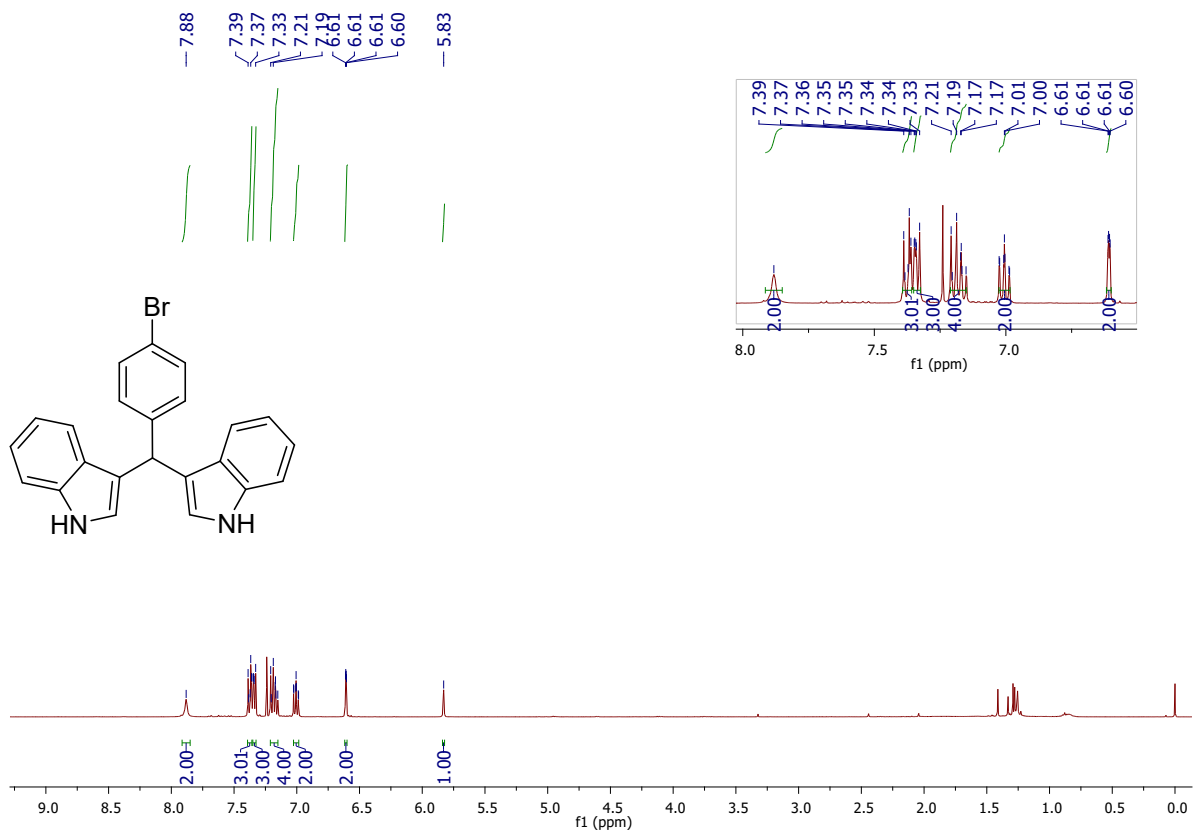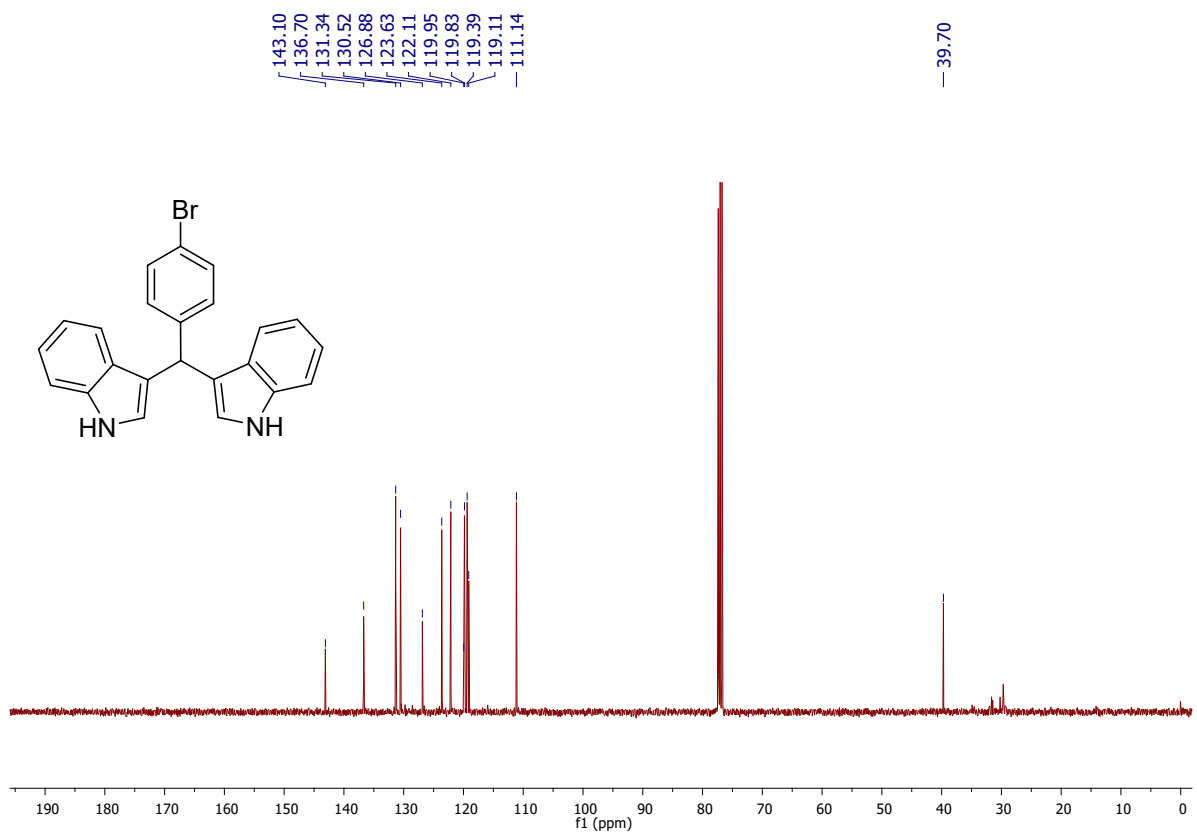



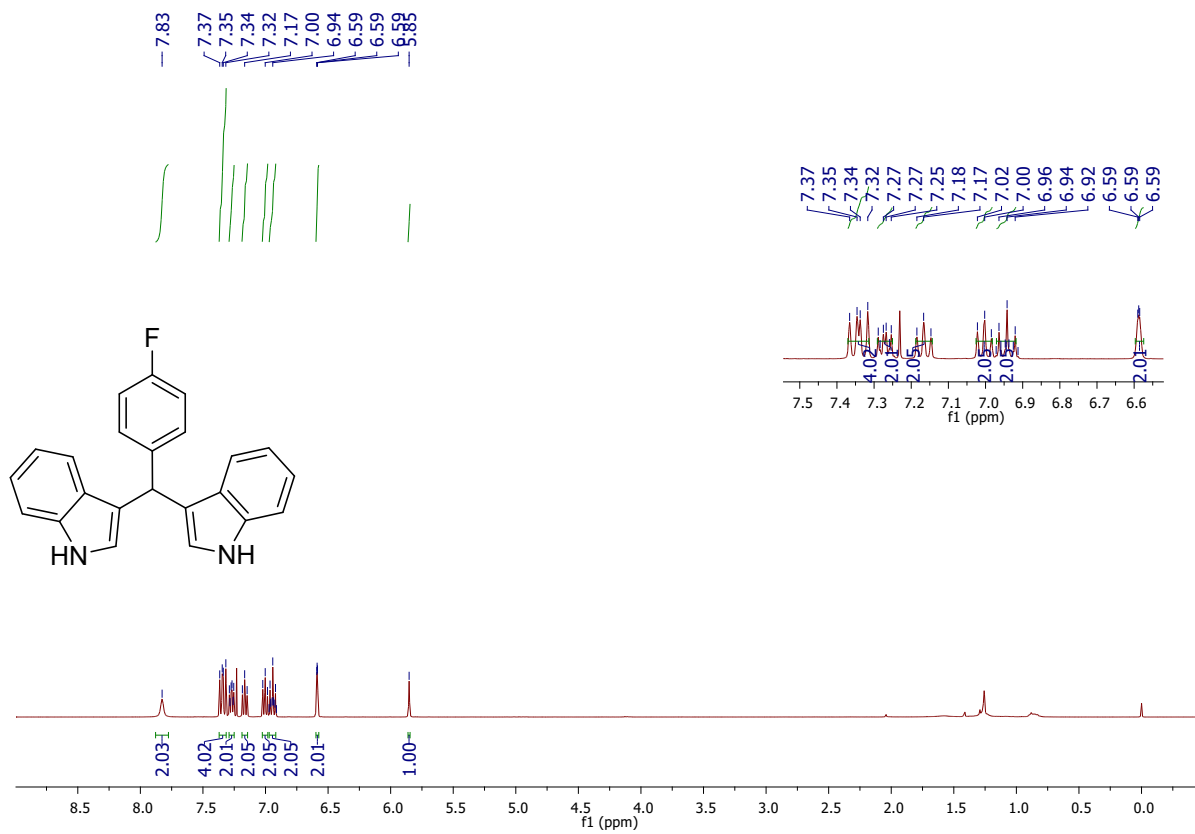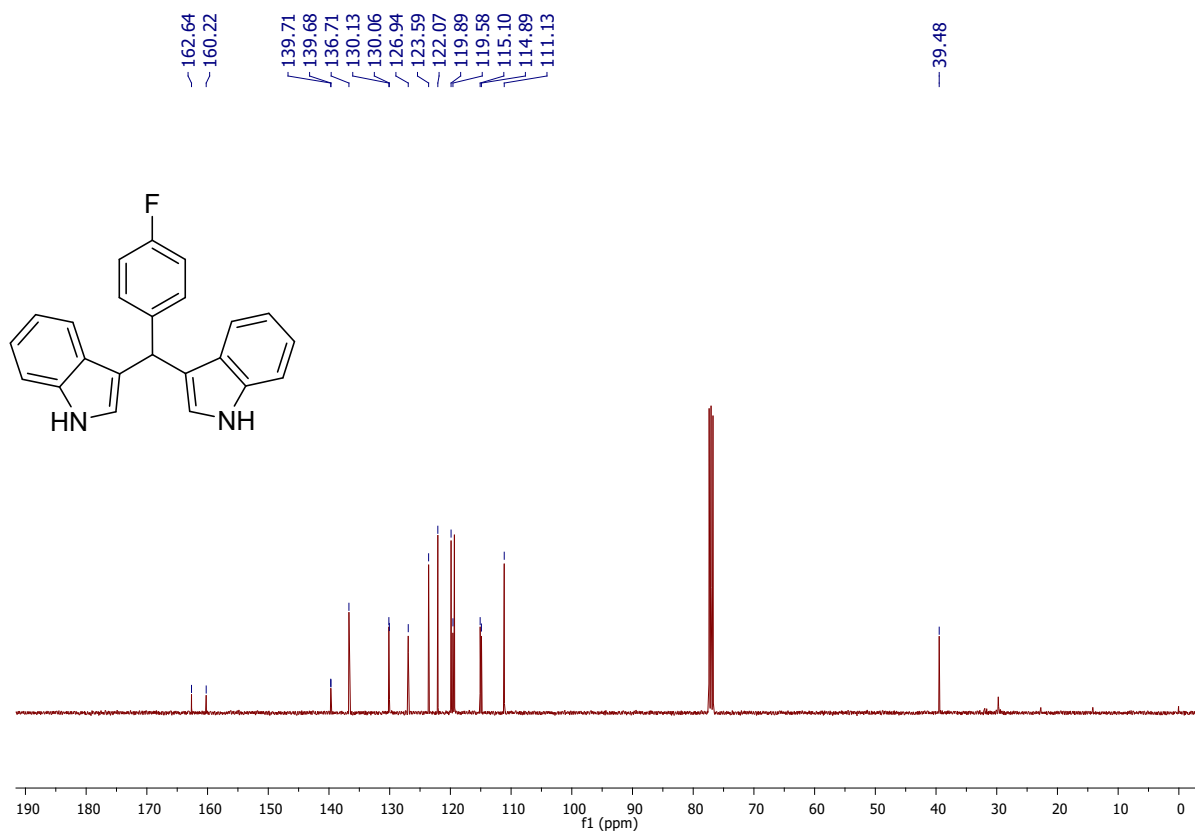

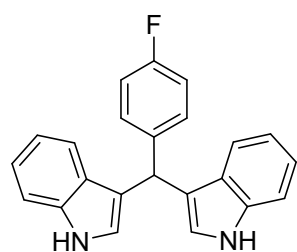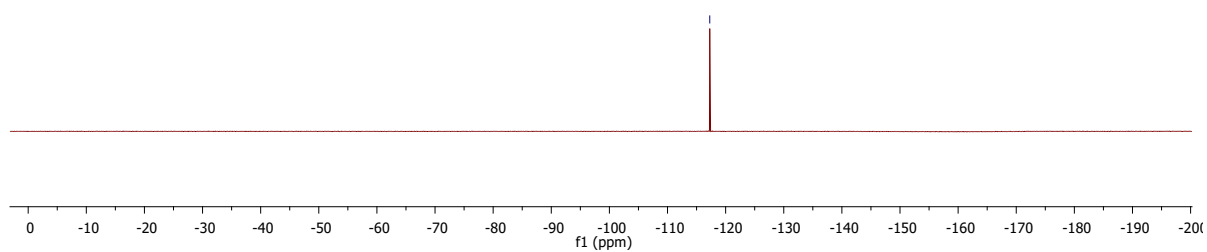

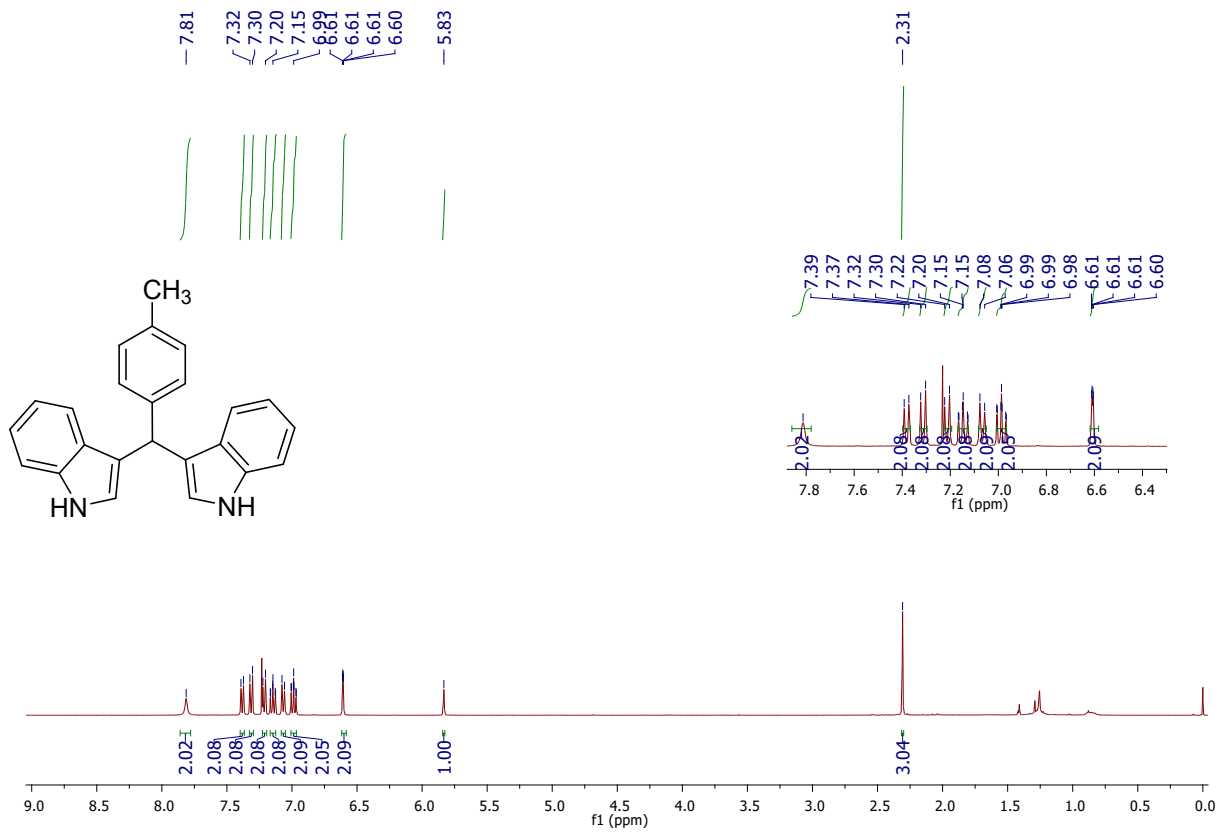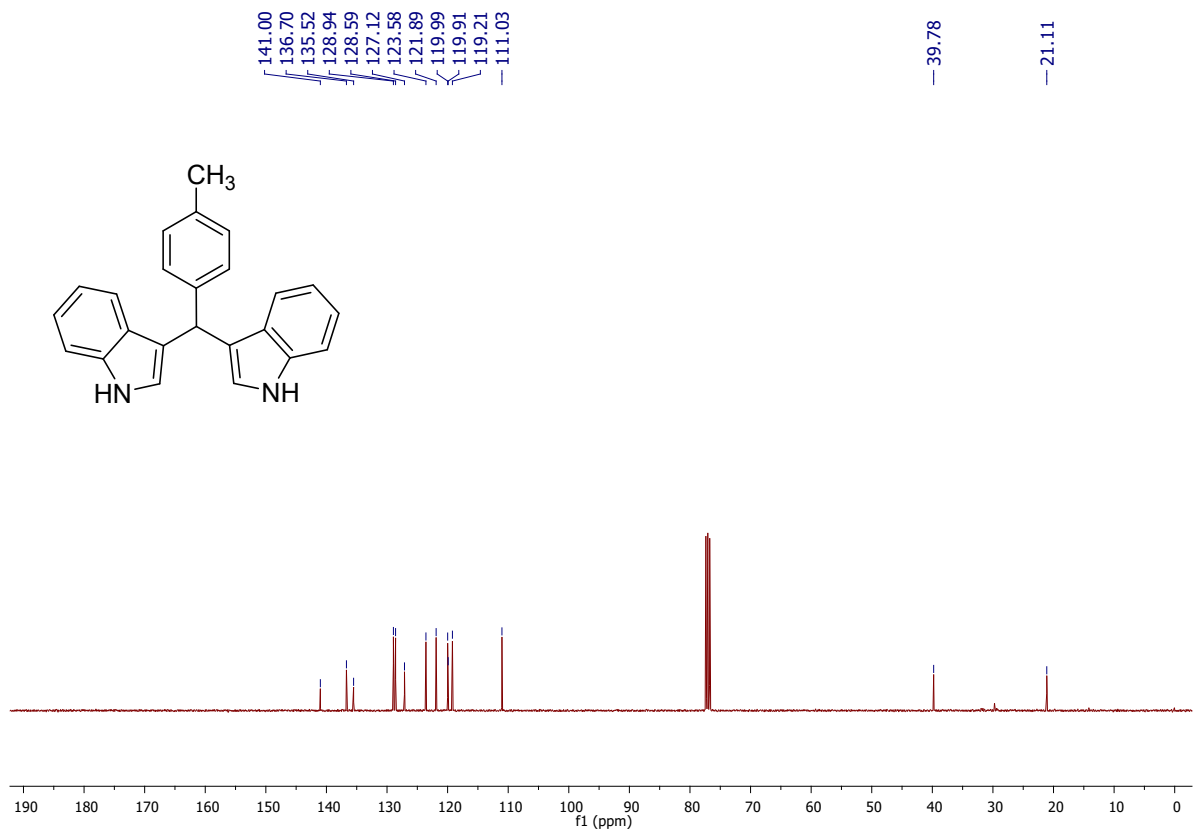

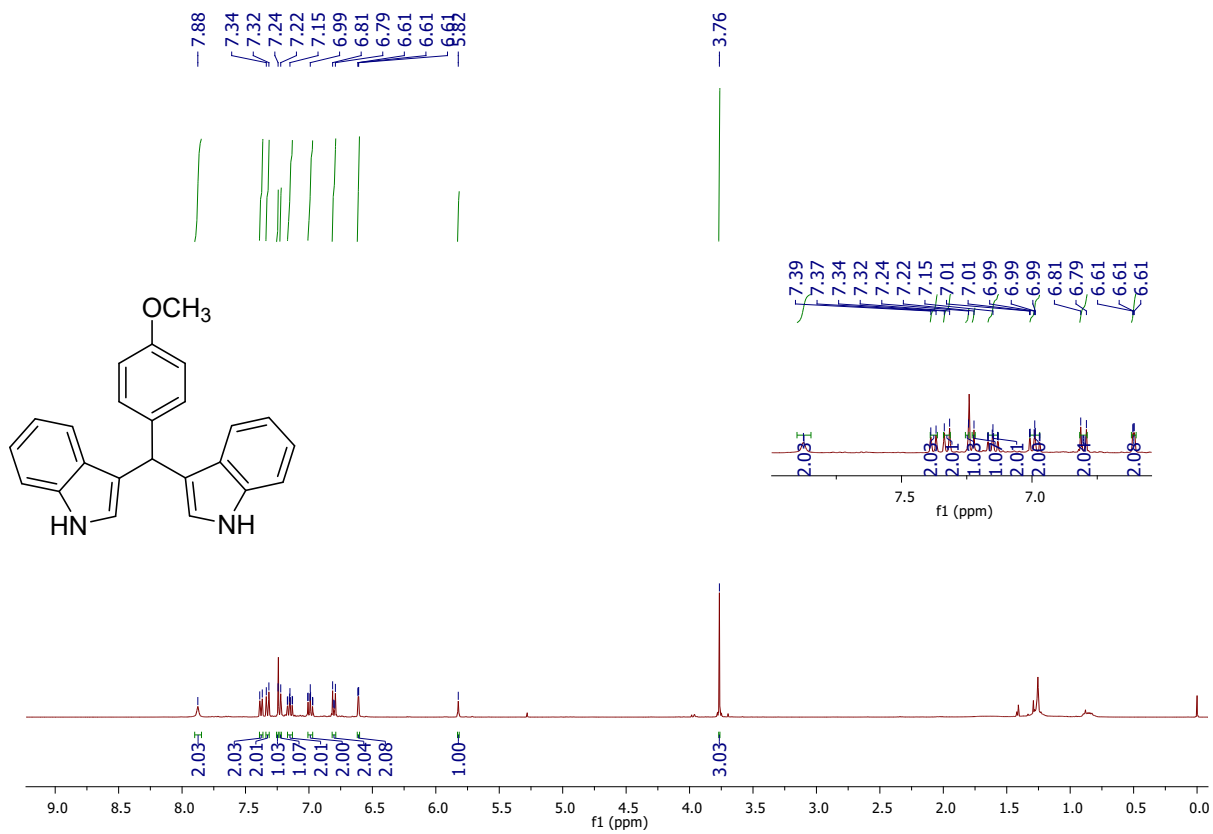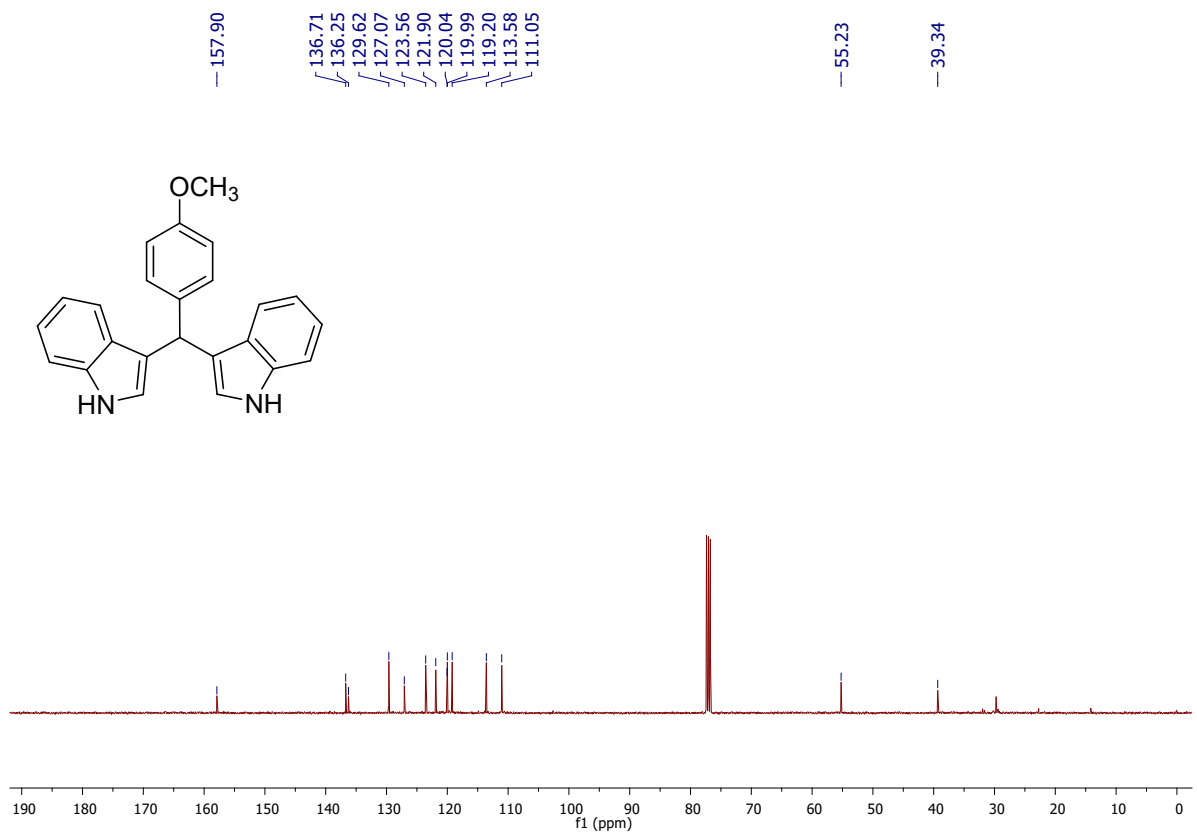



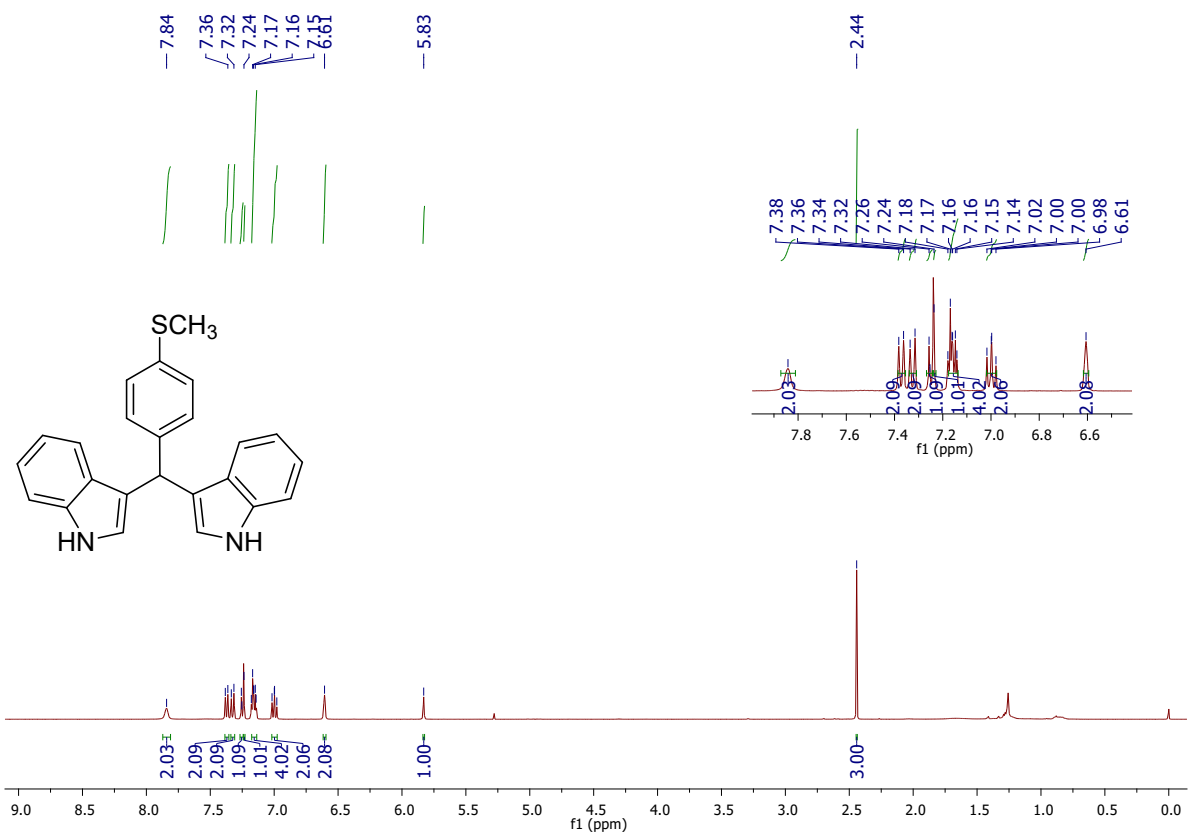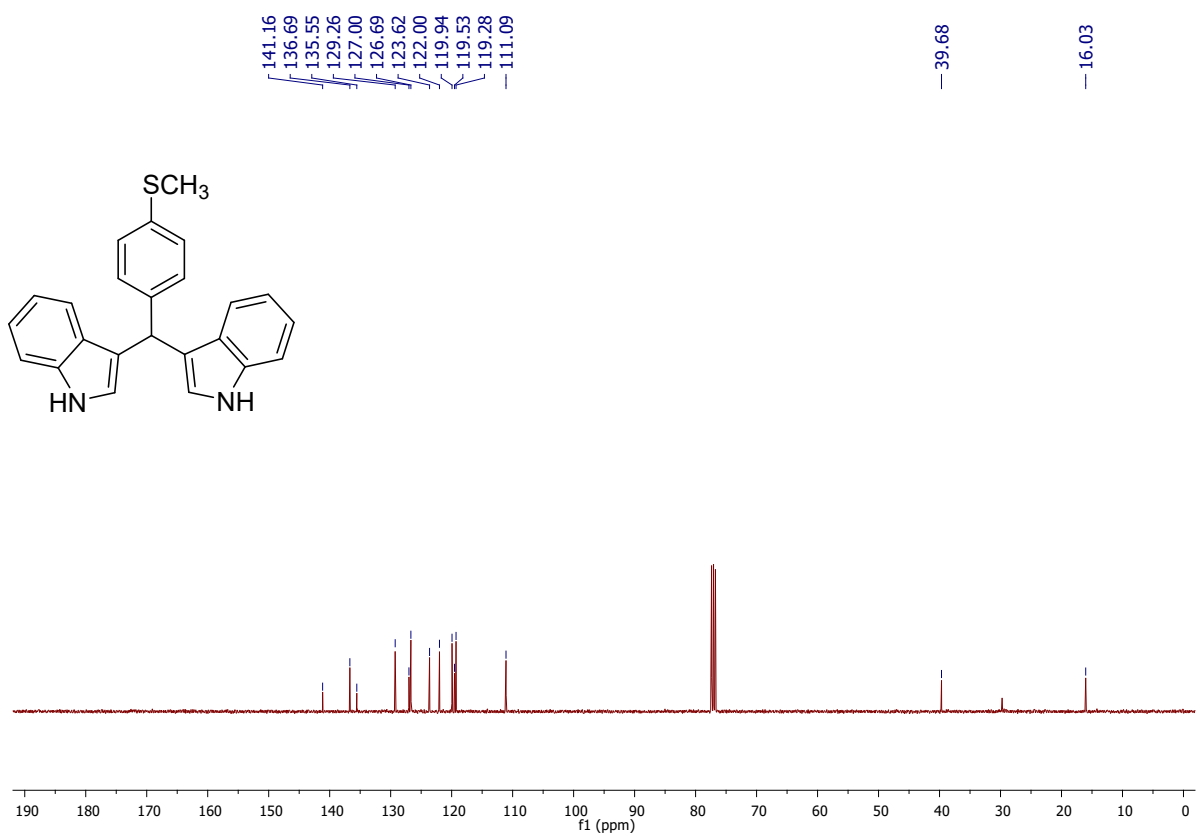

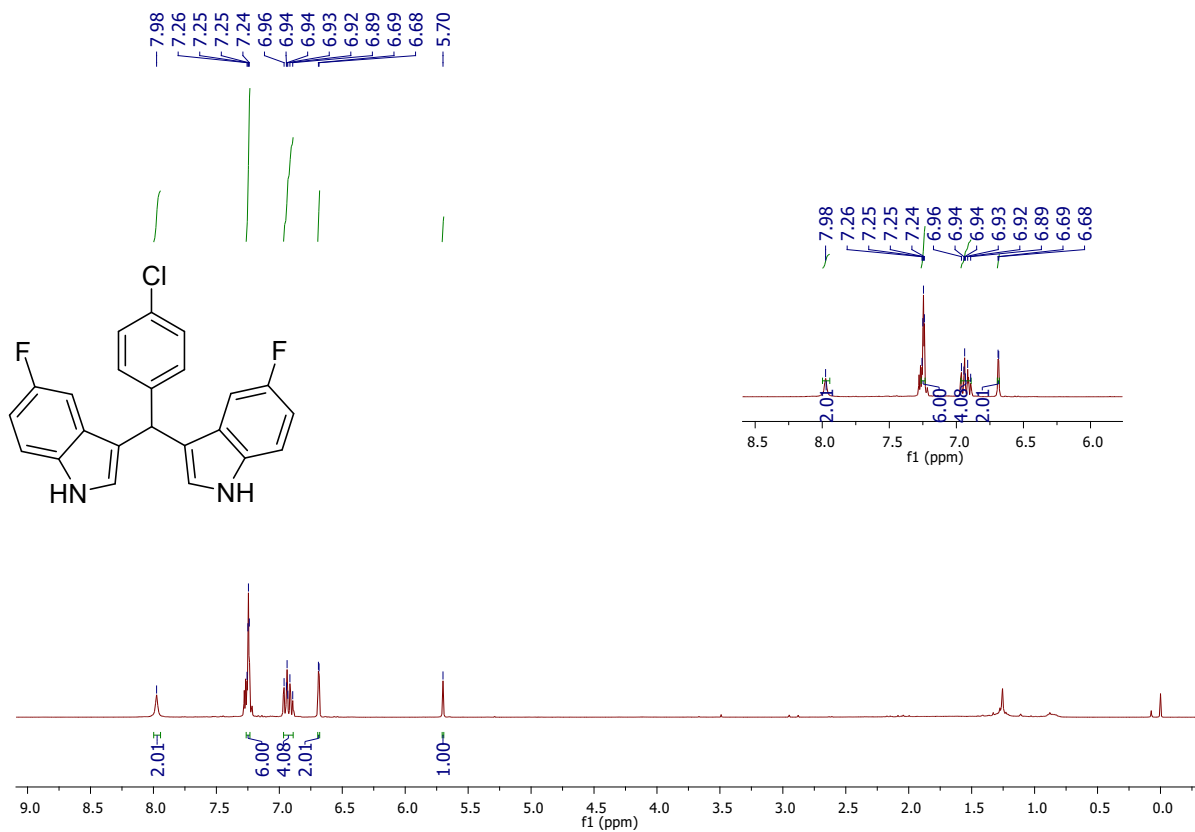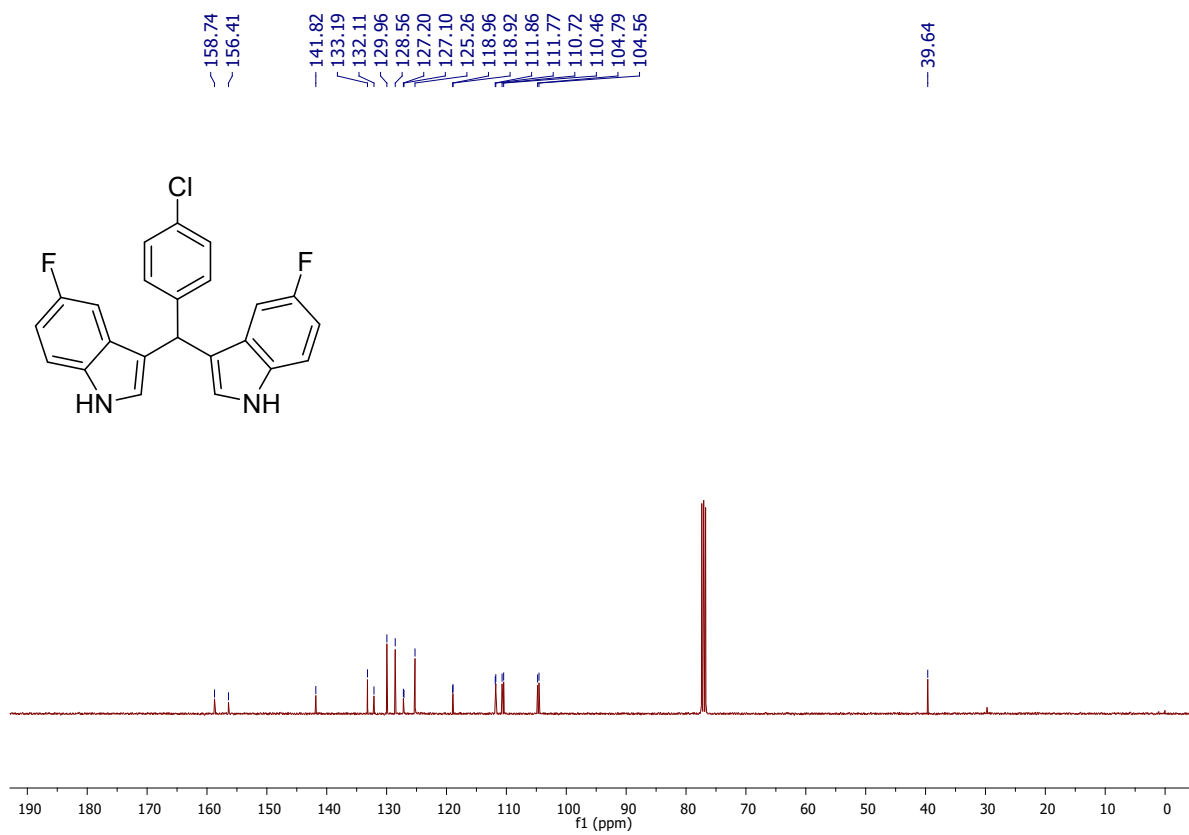

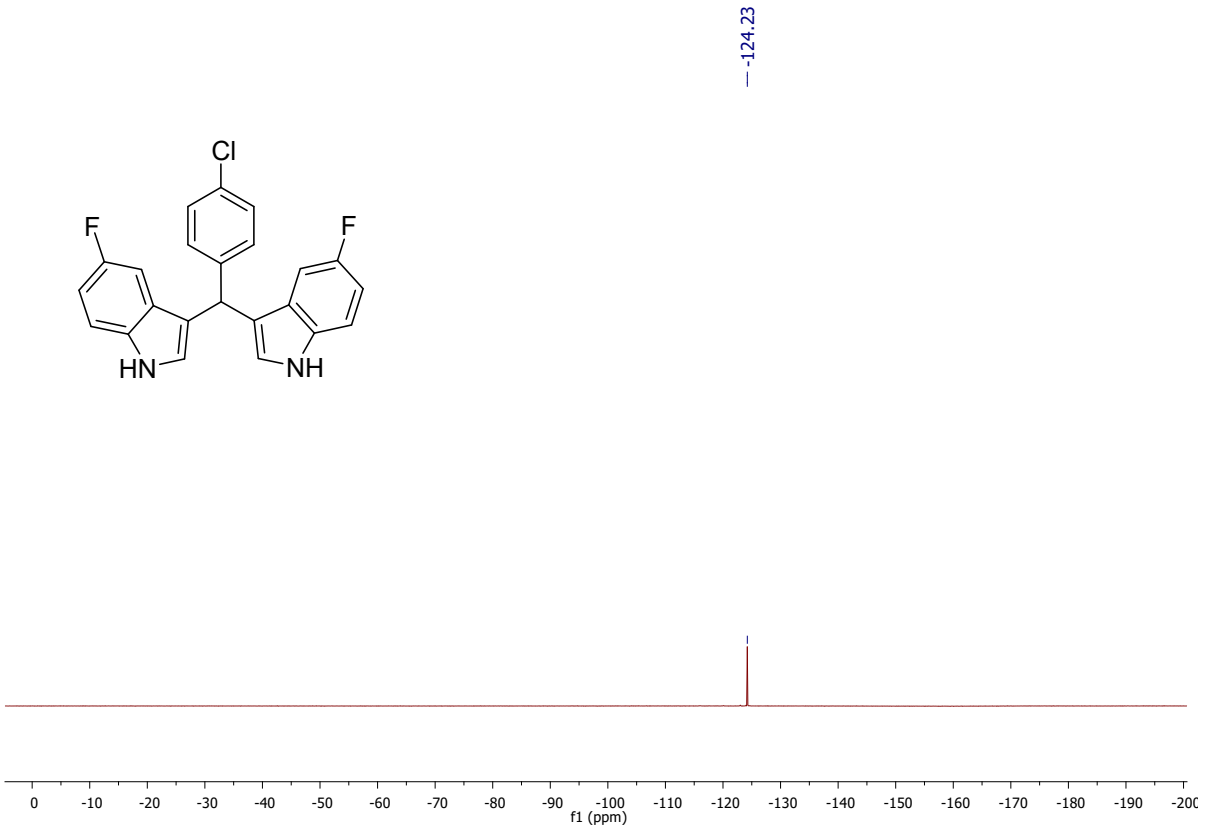

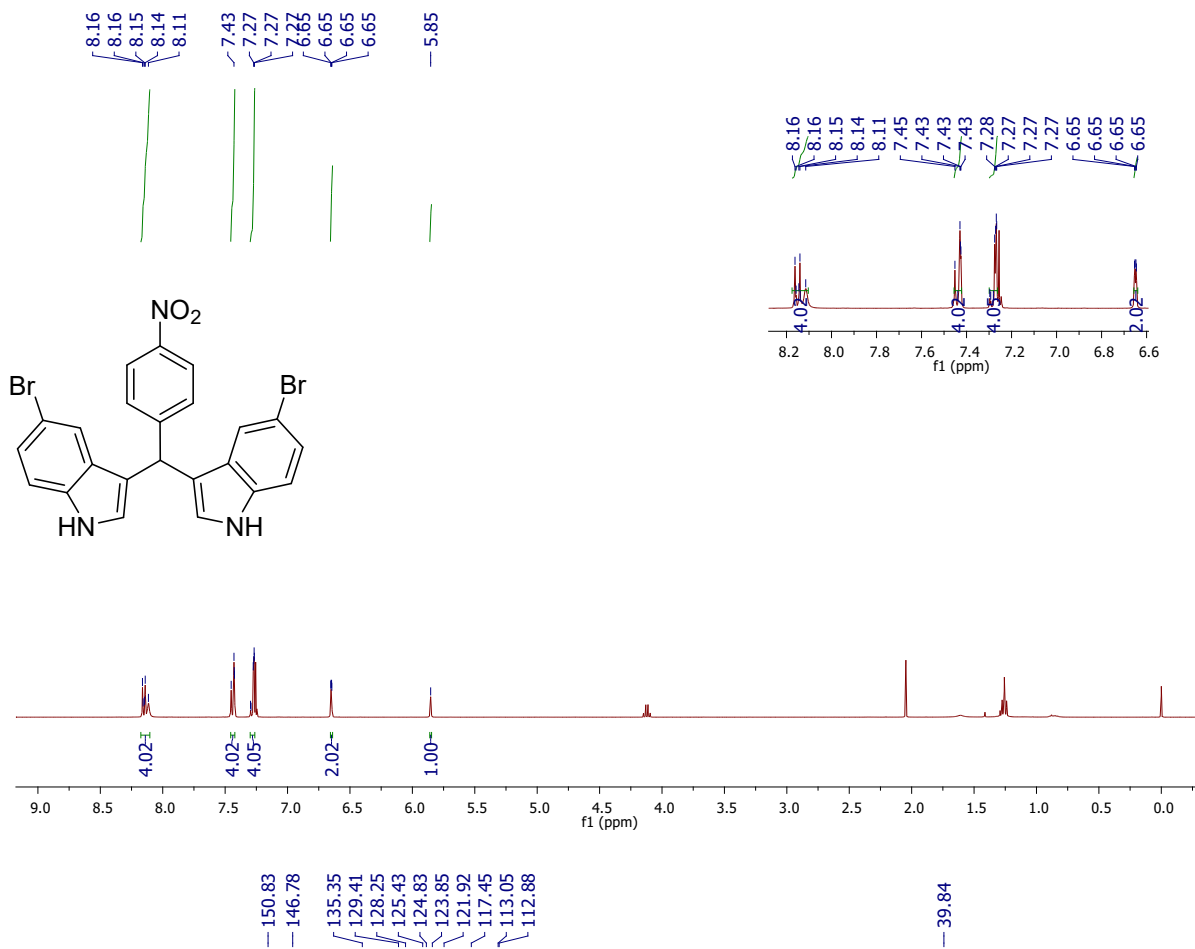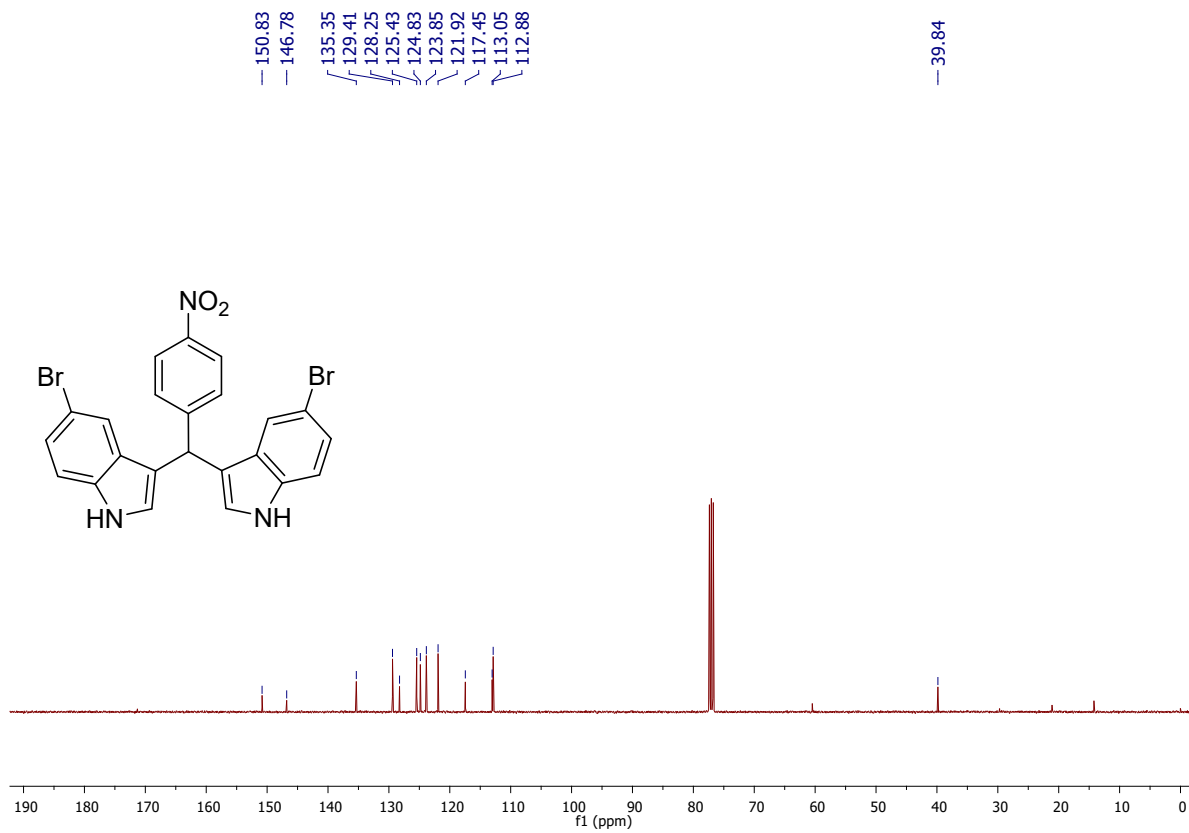

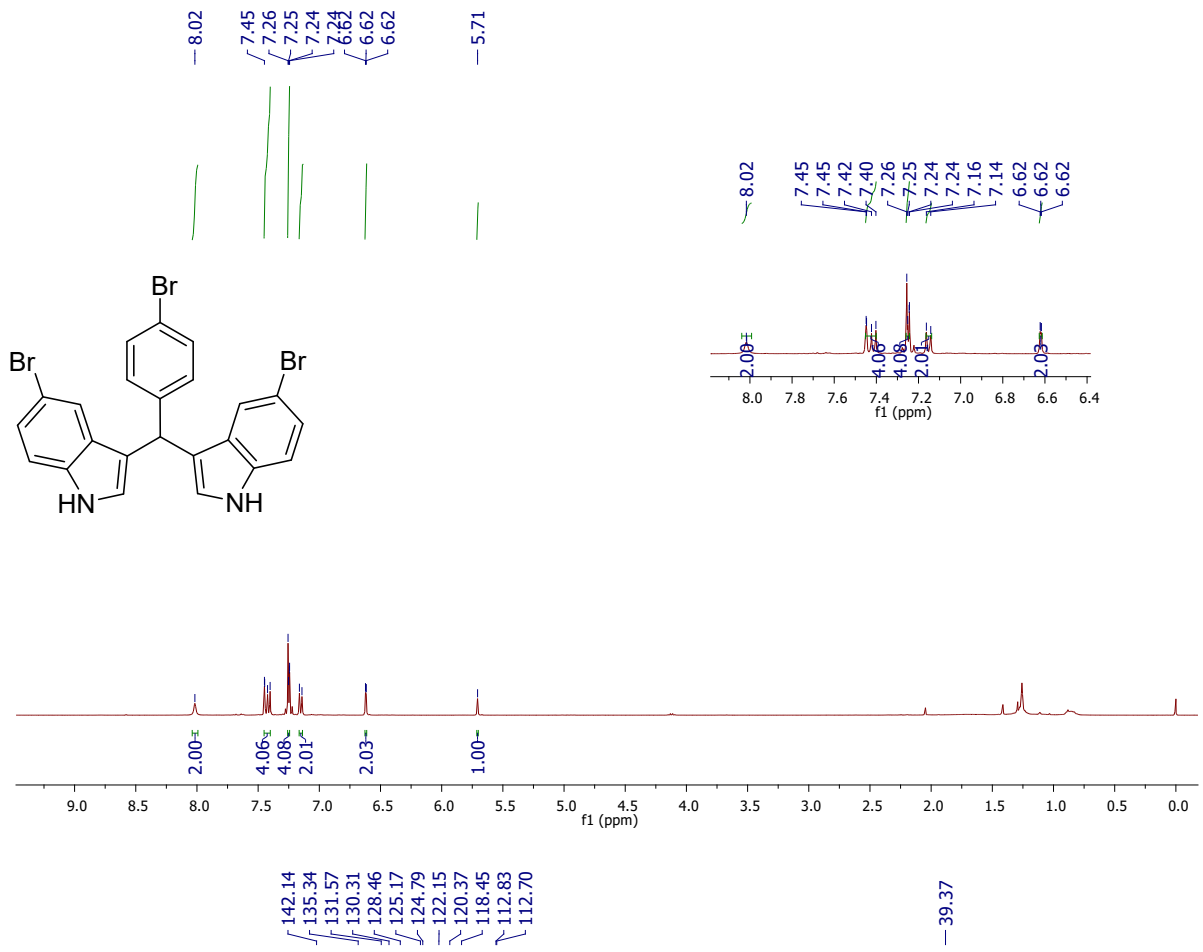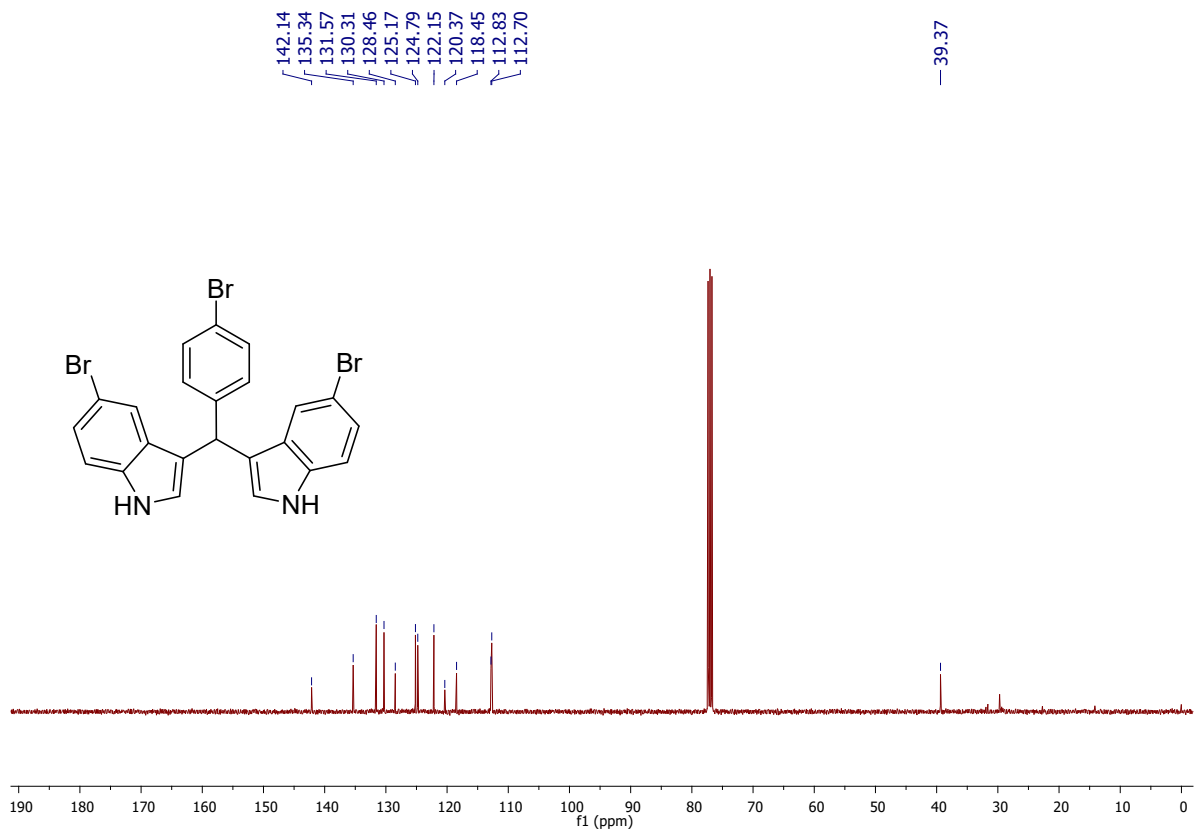

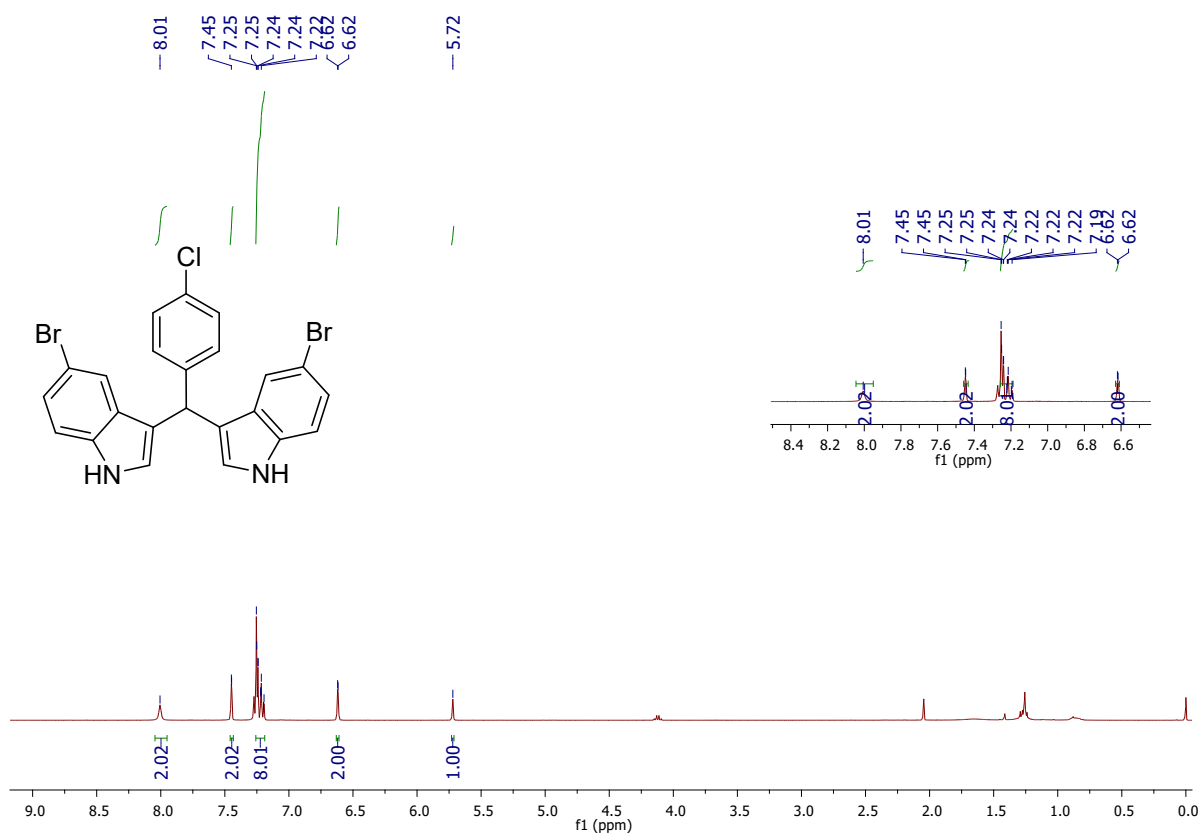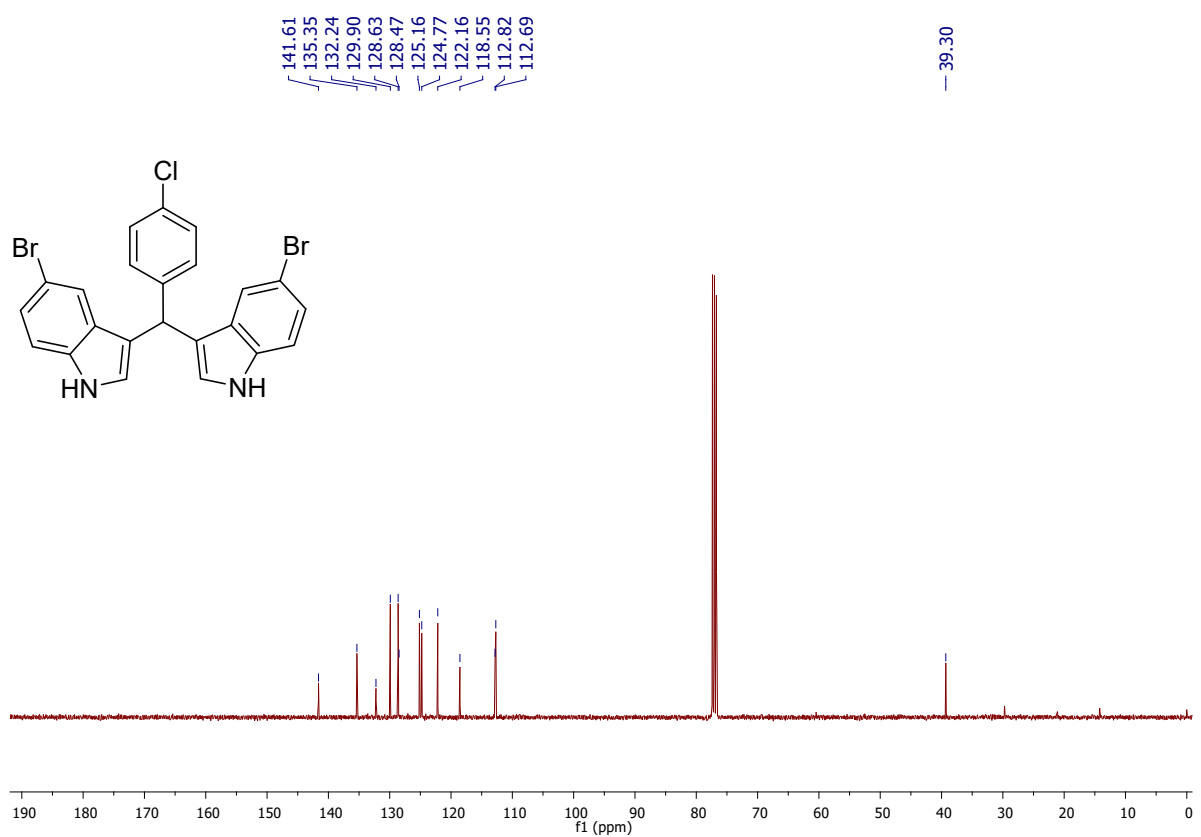

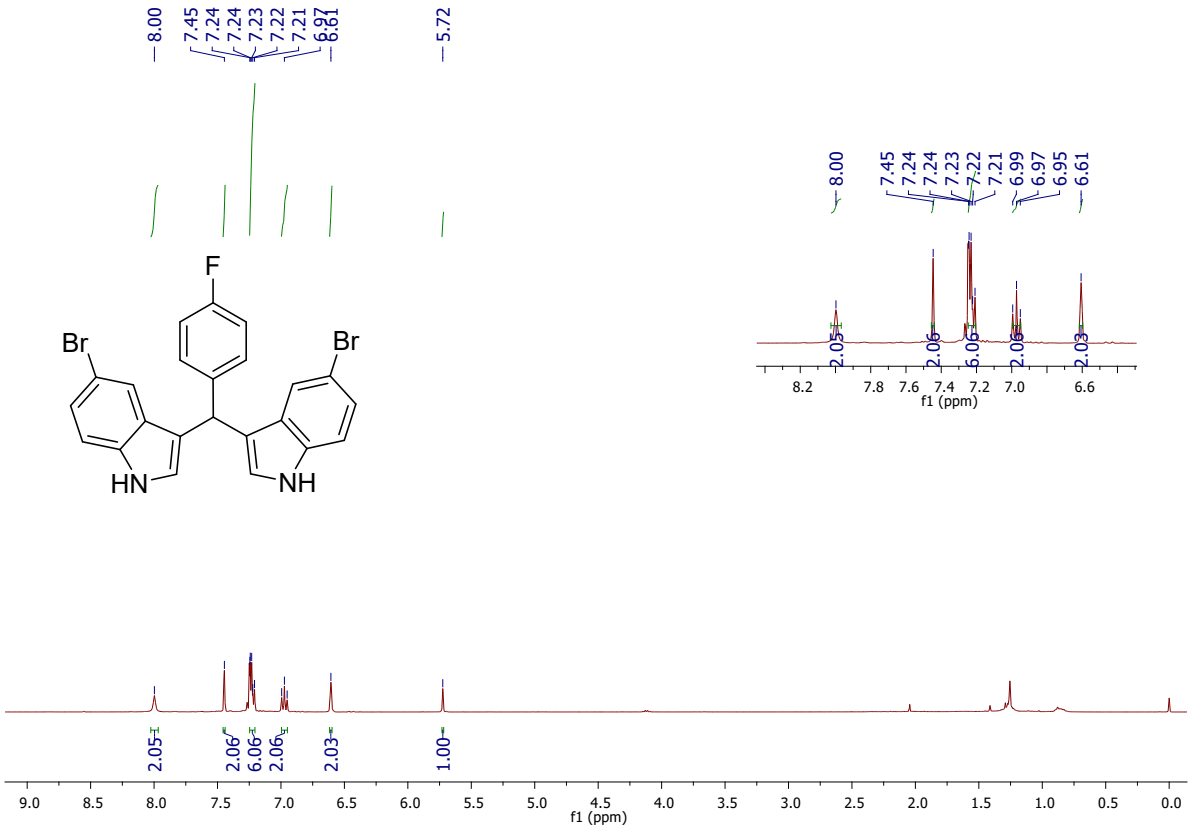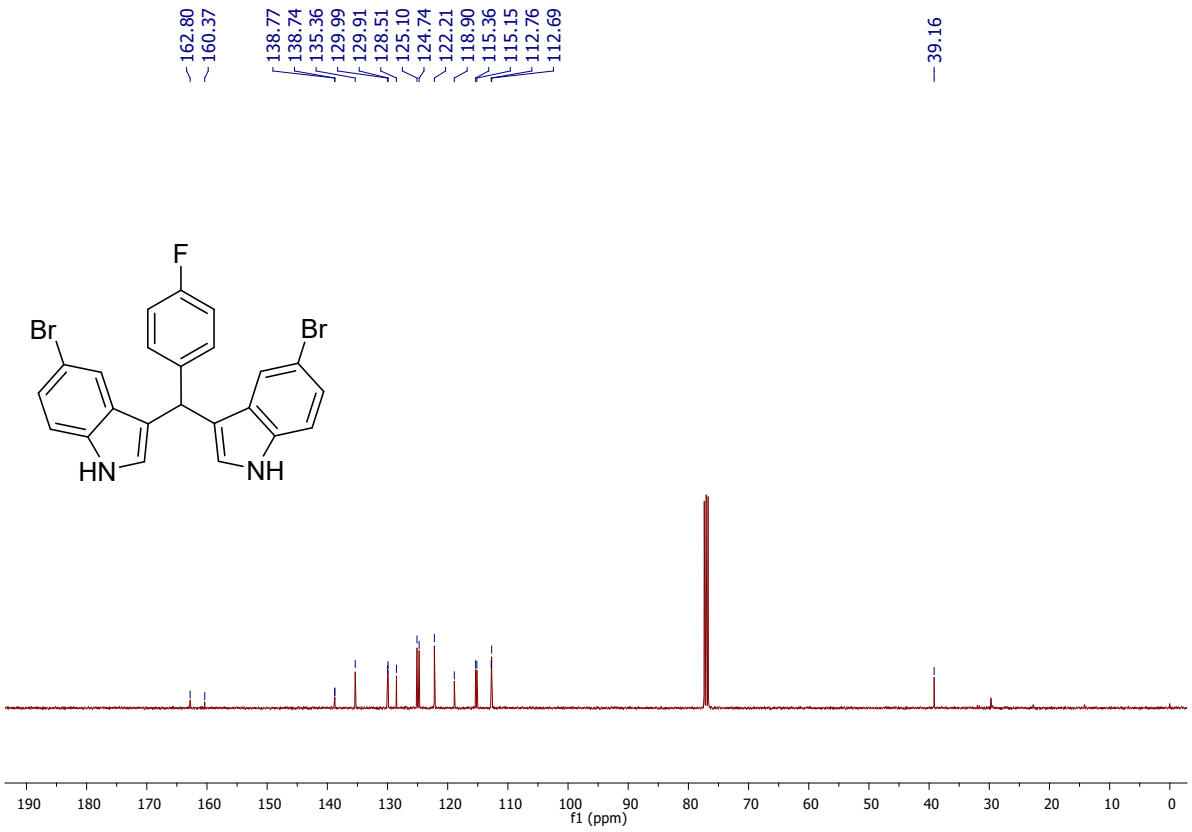

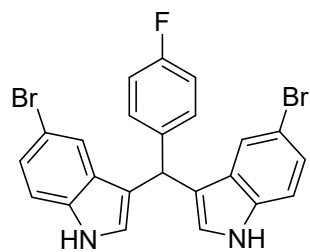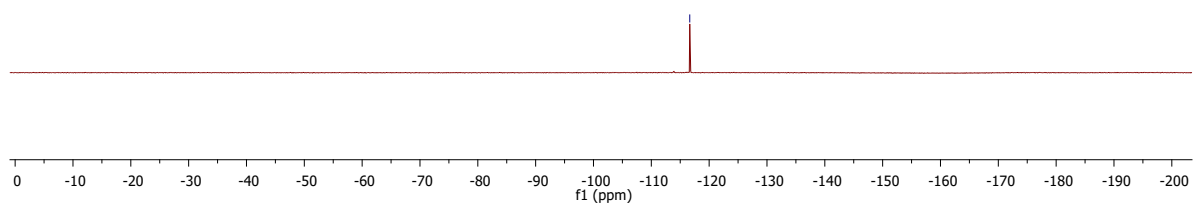

-116.65



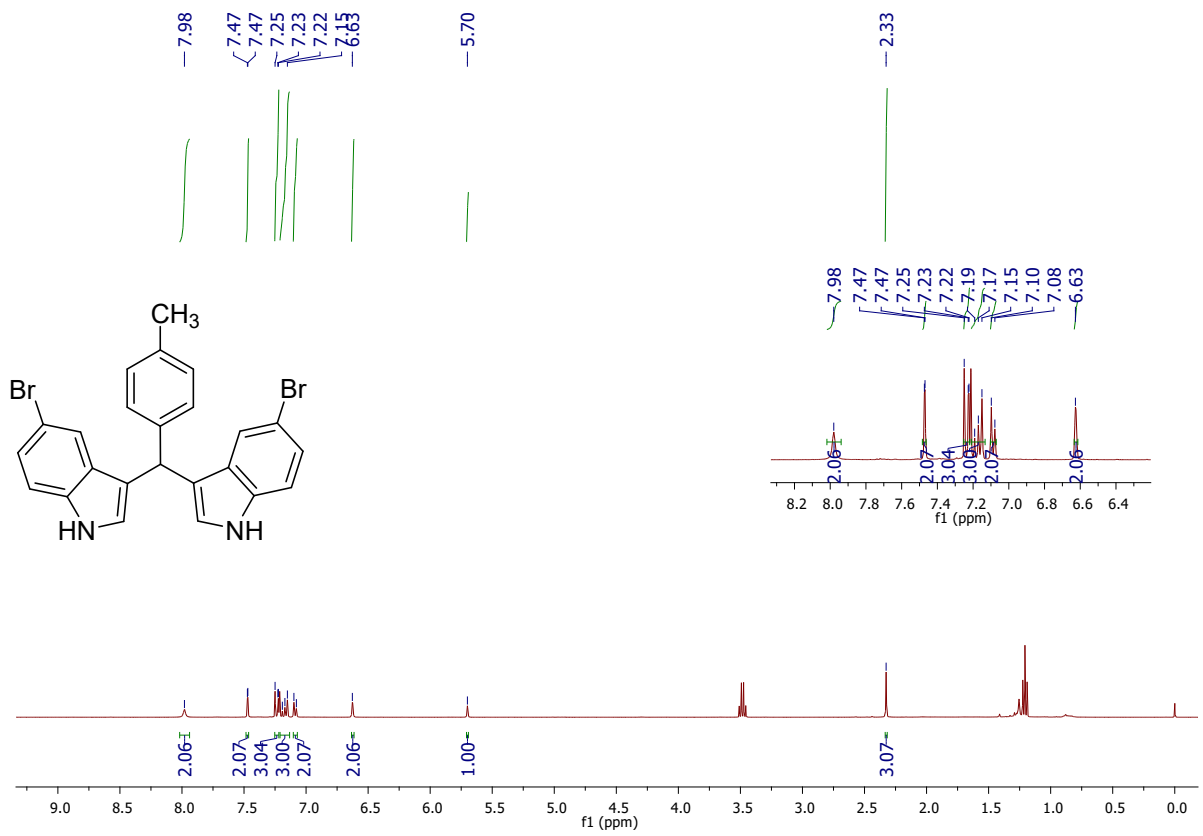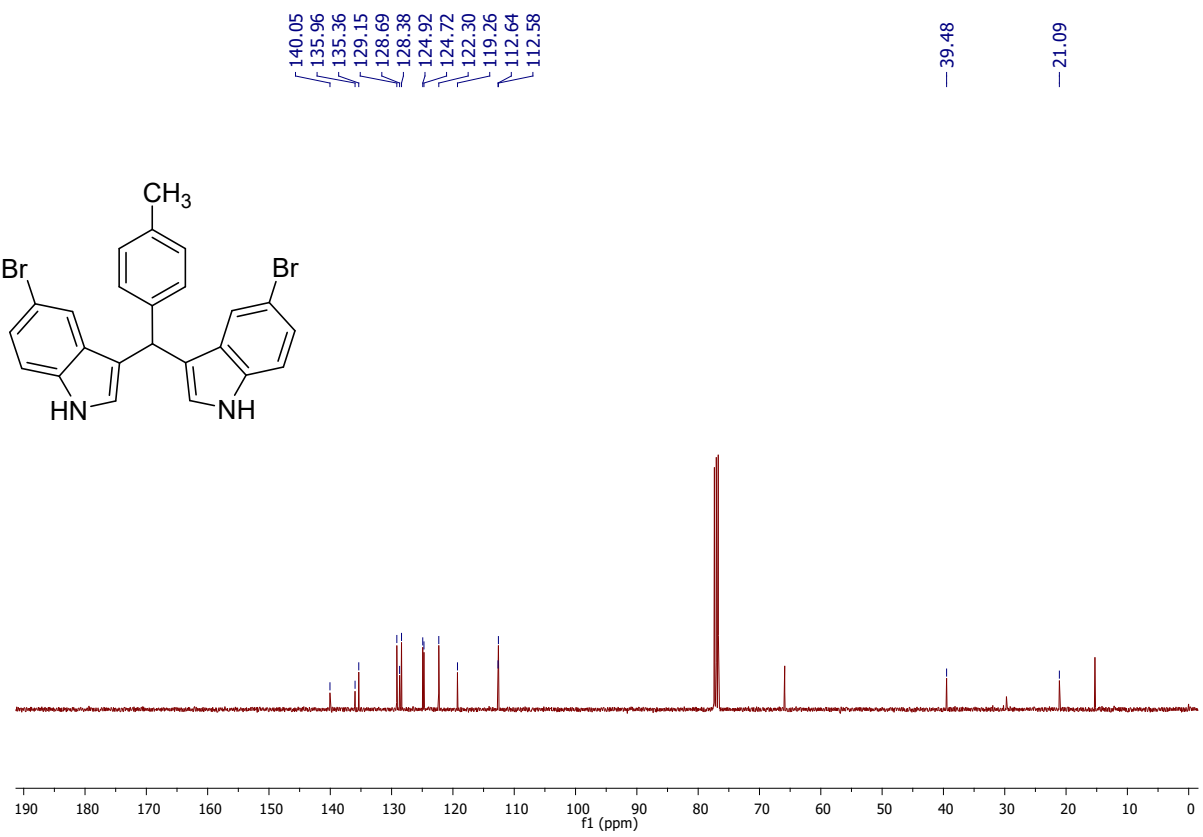

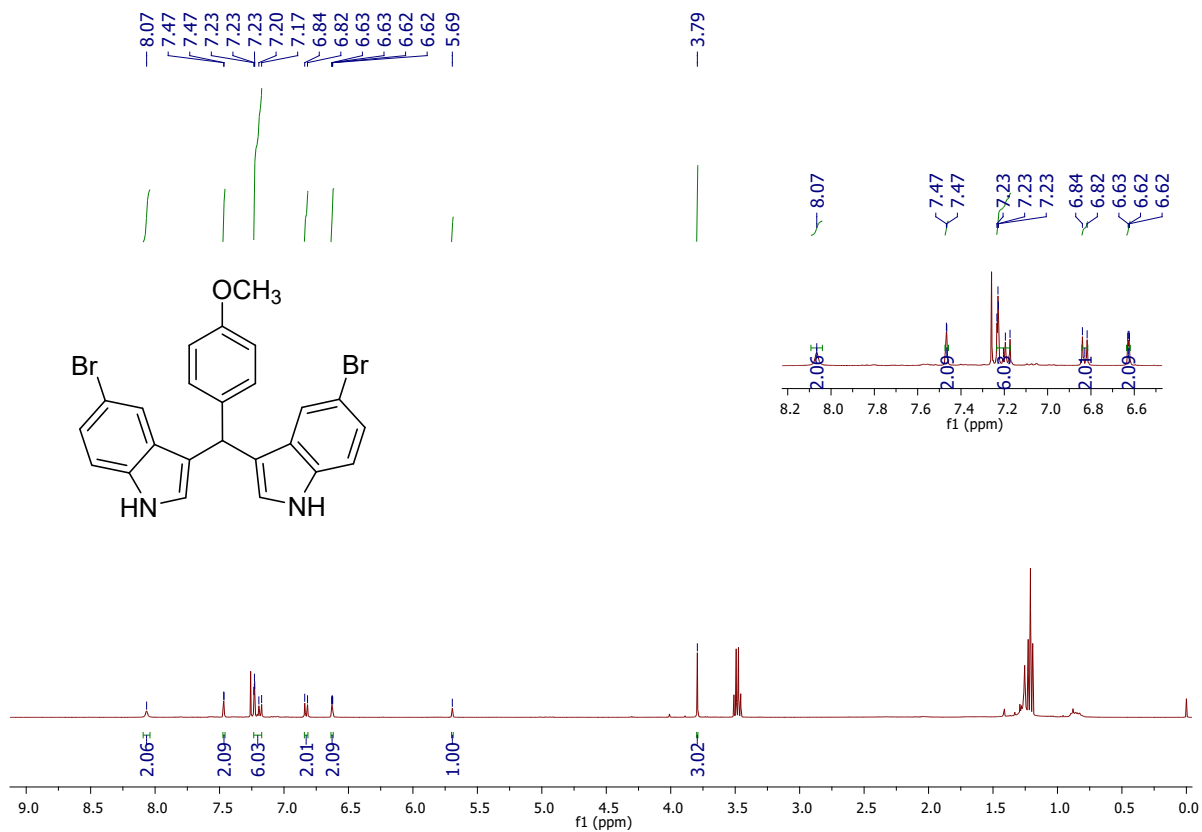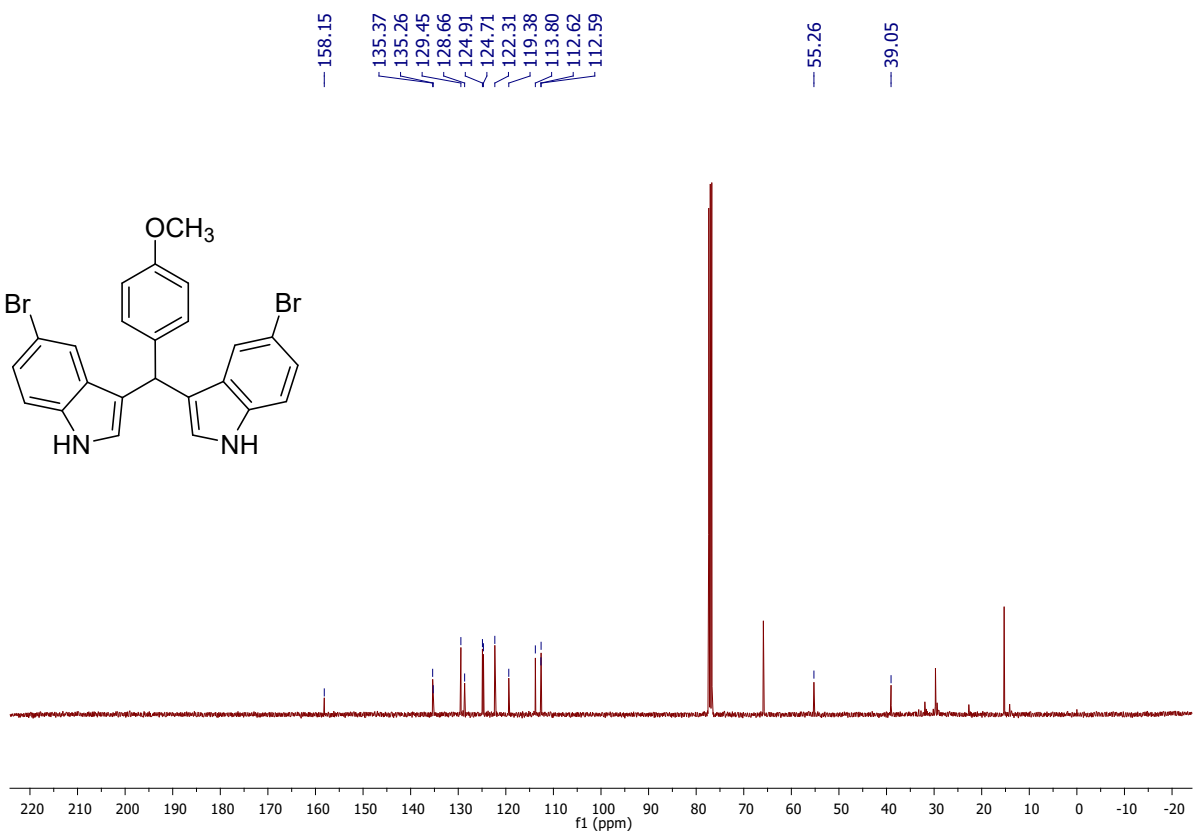

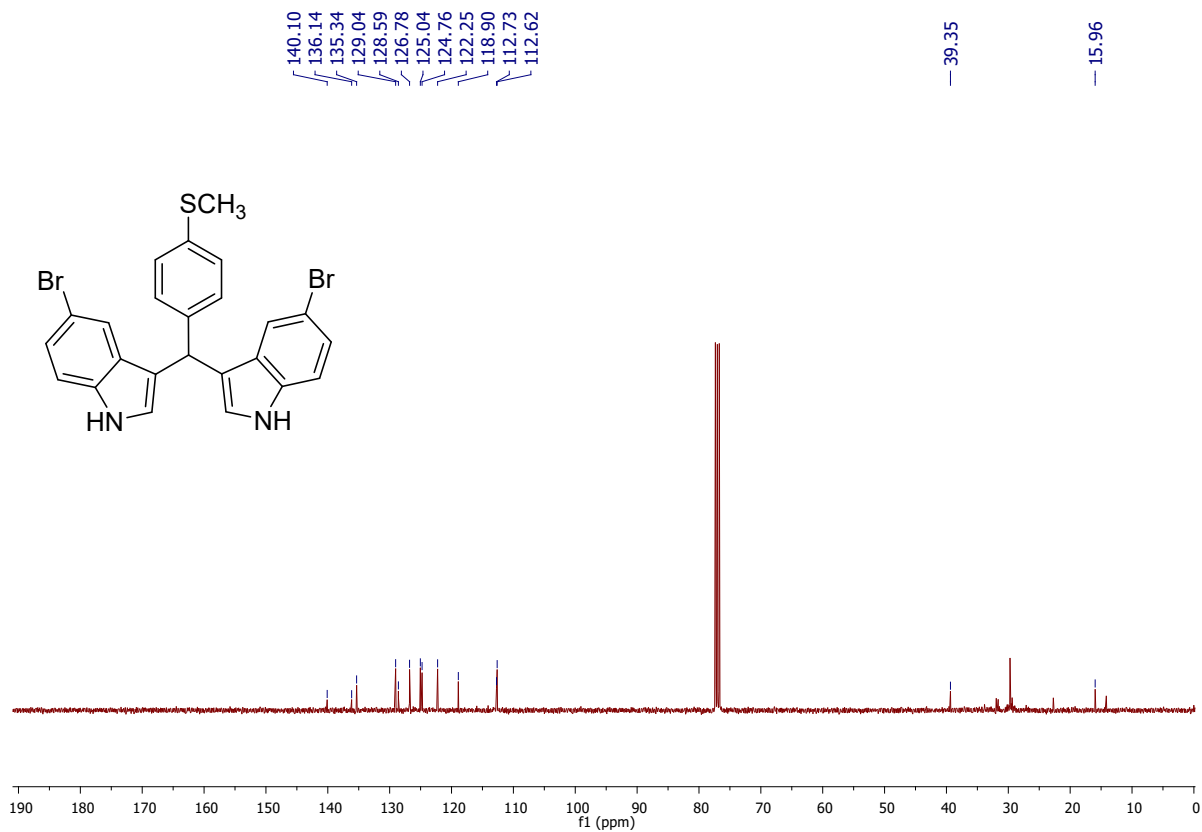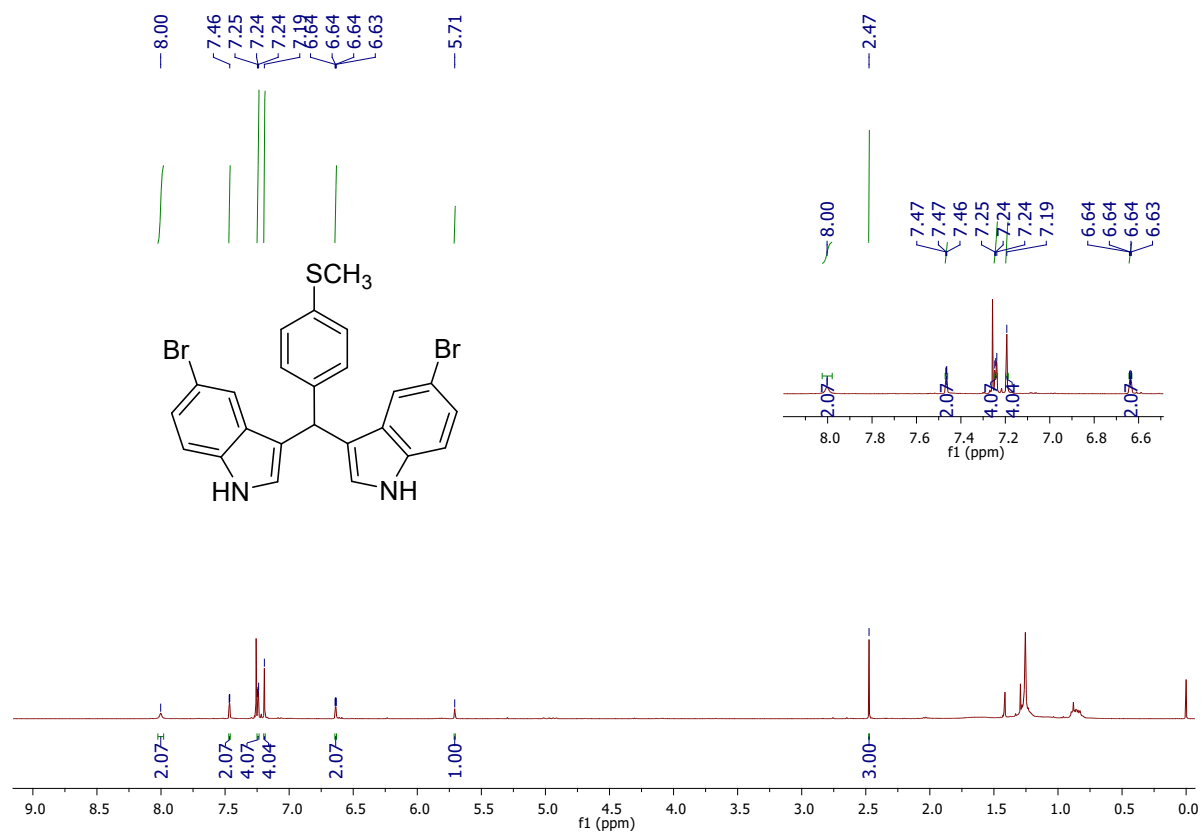

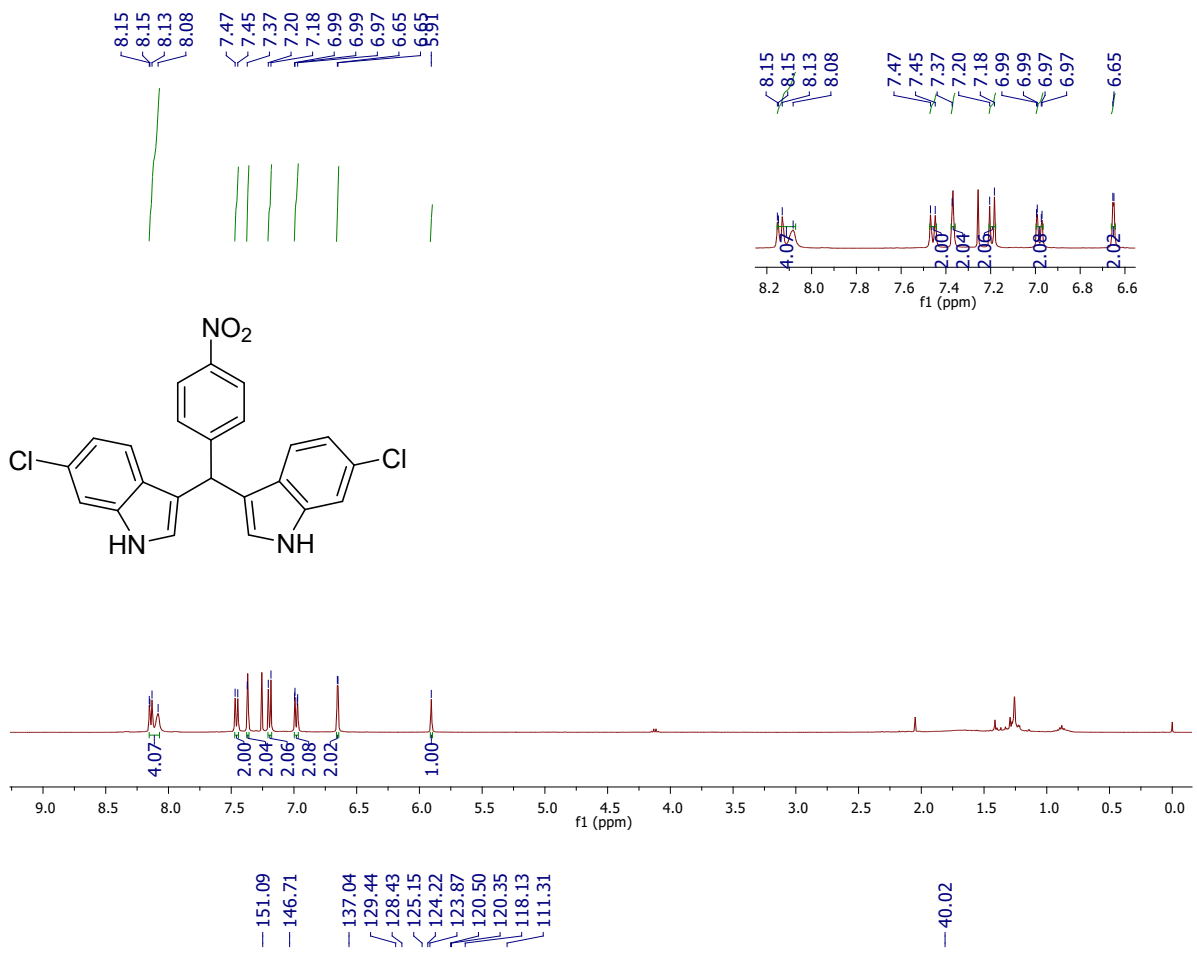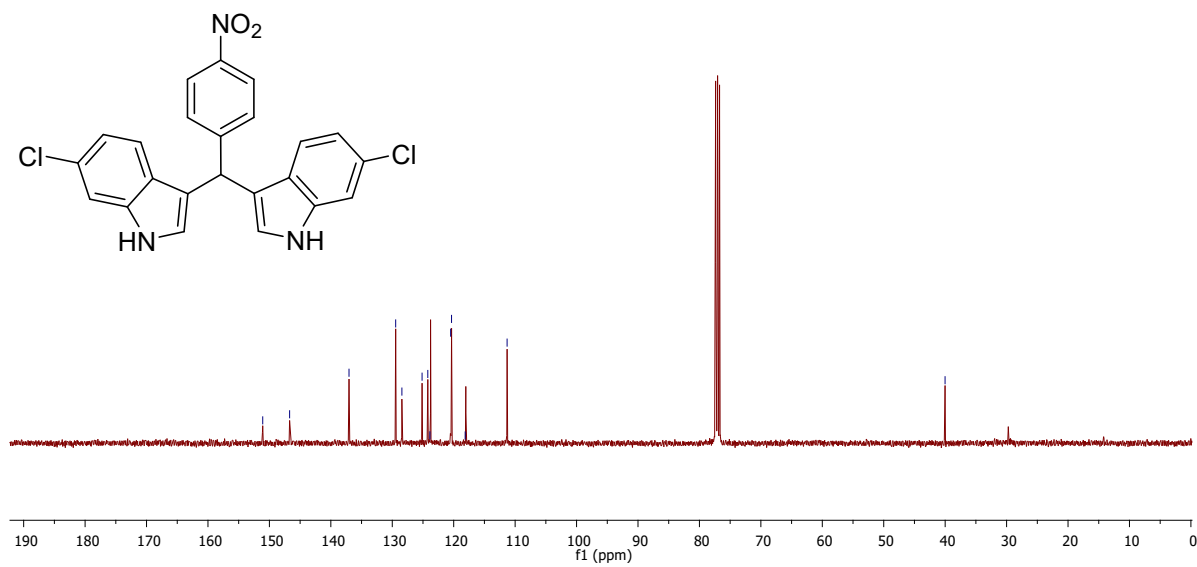

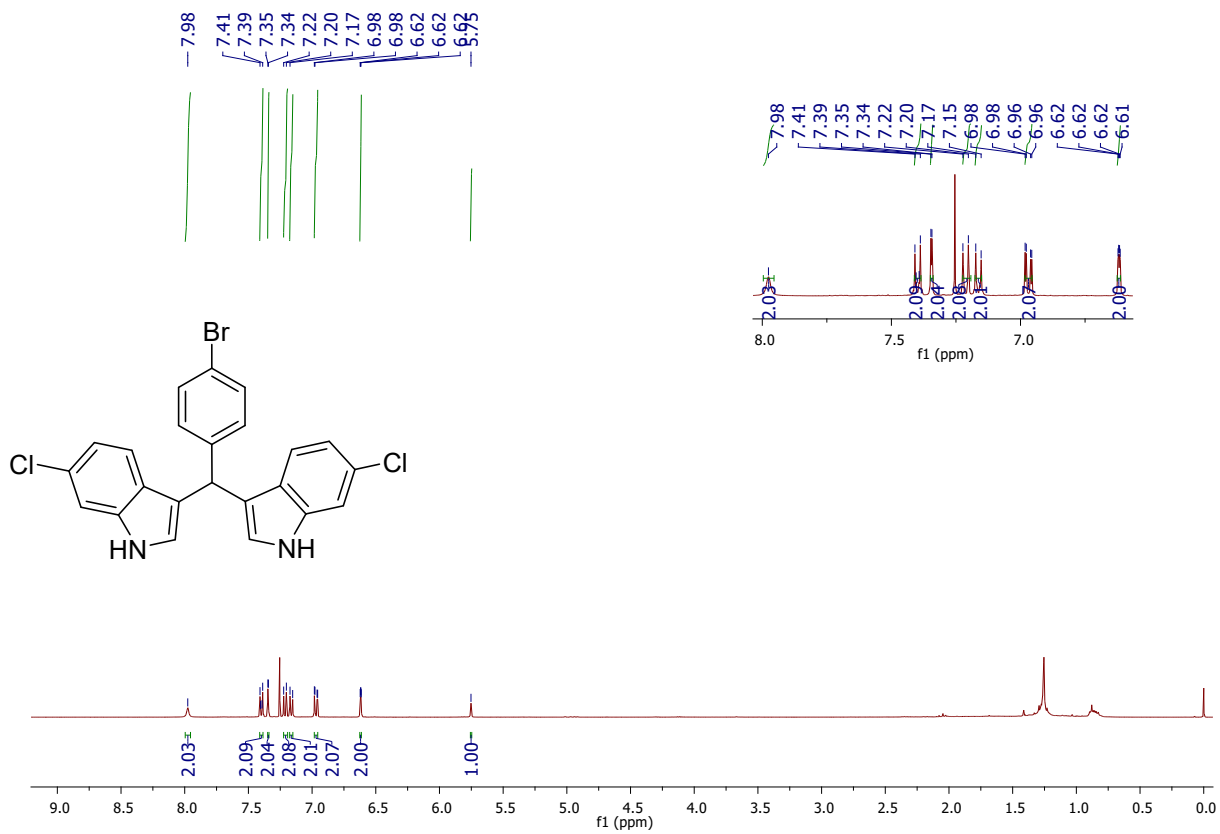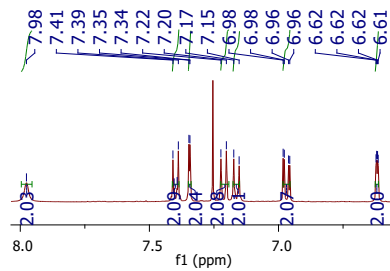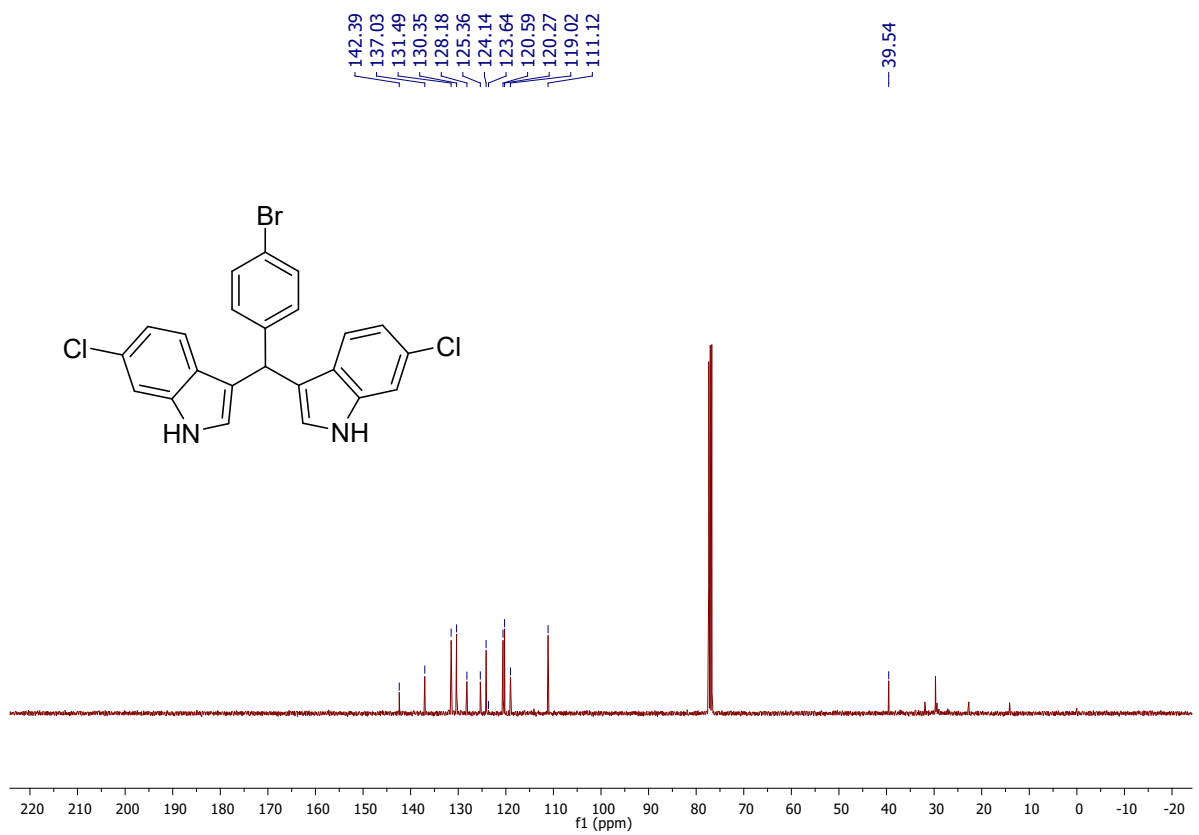

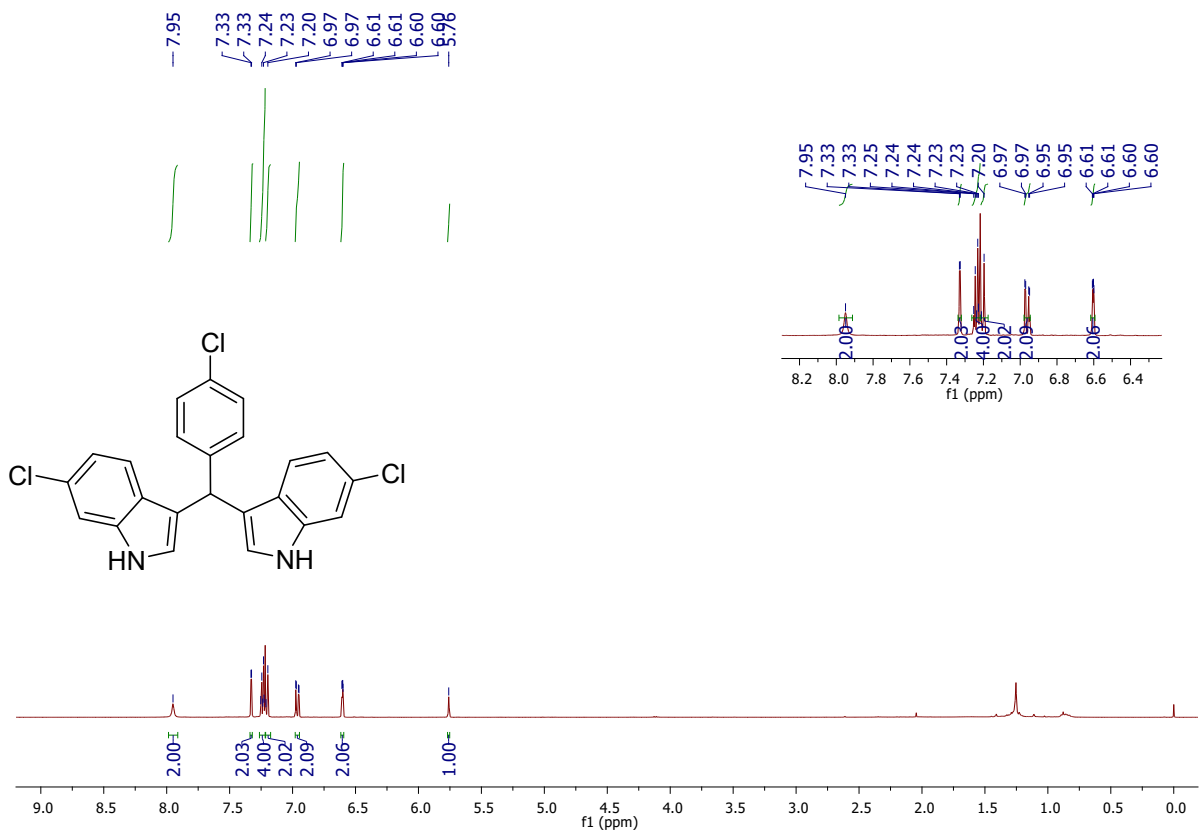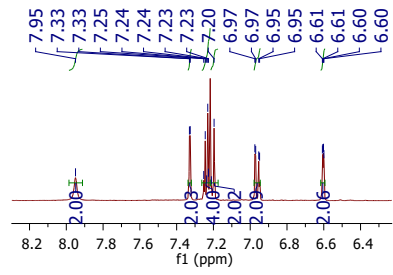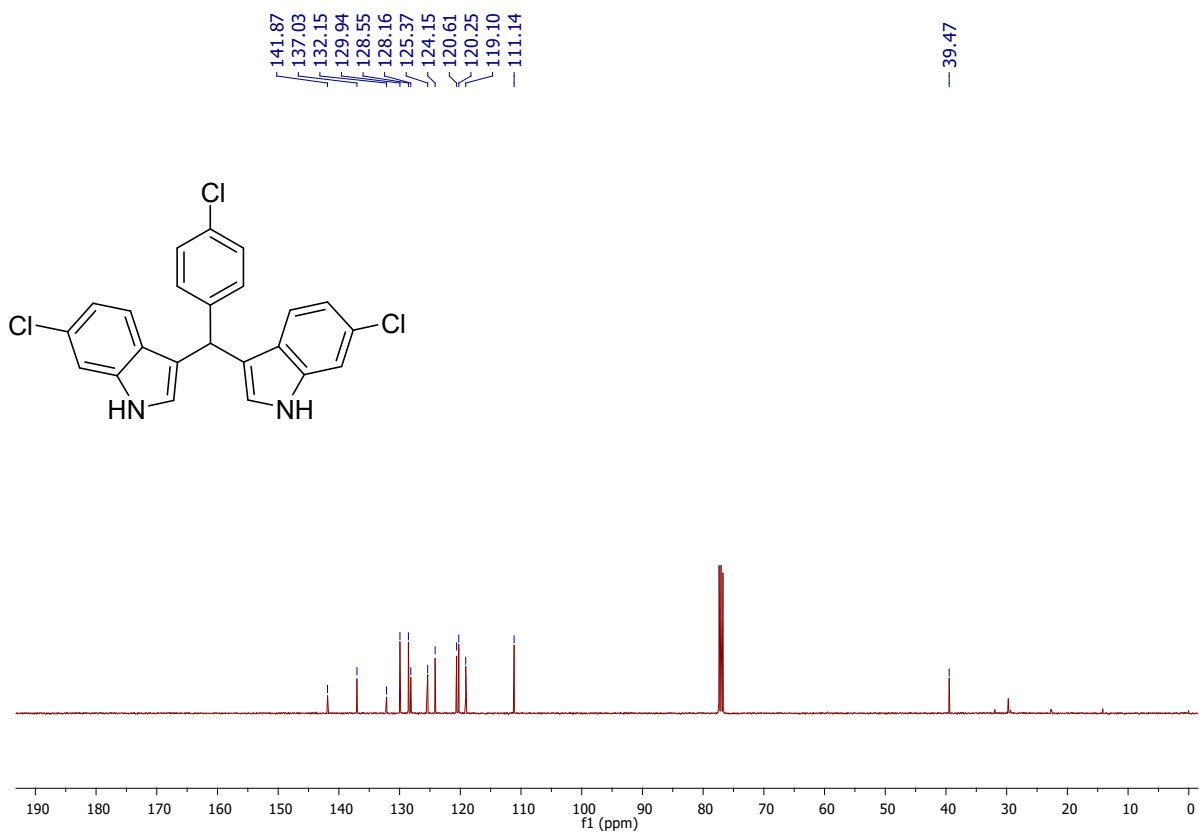



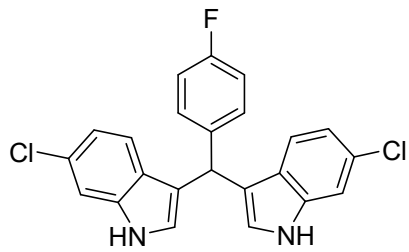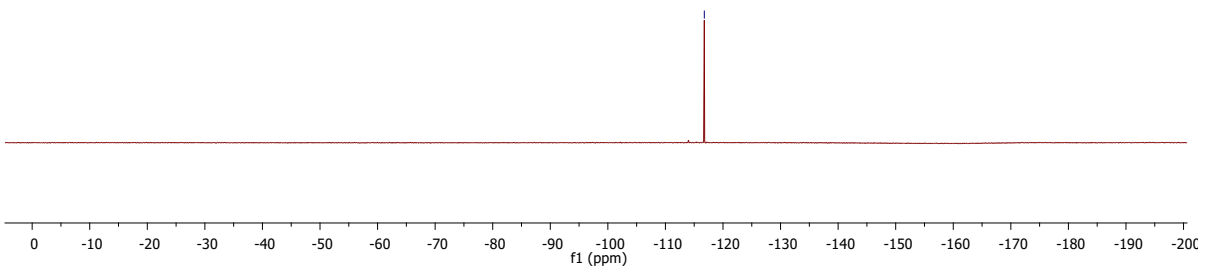



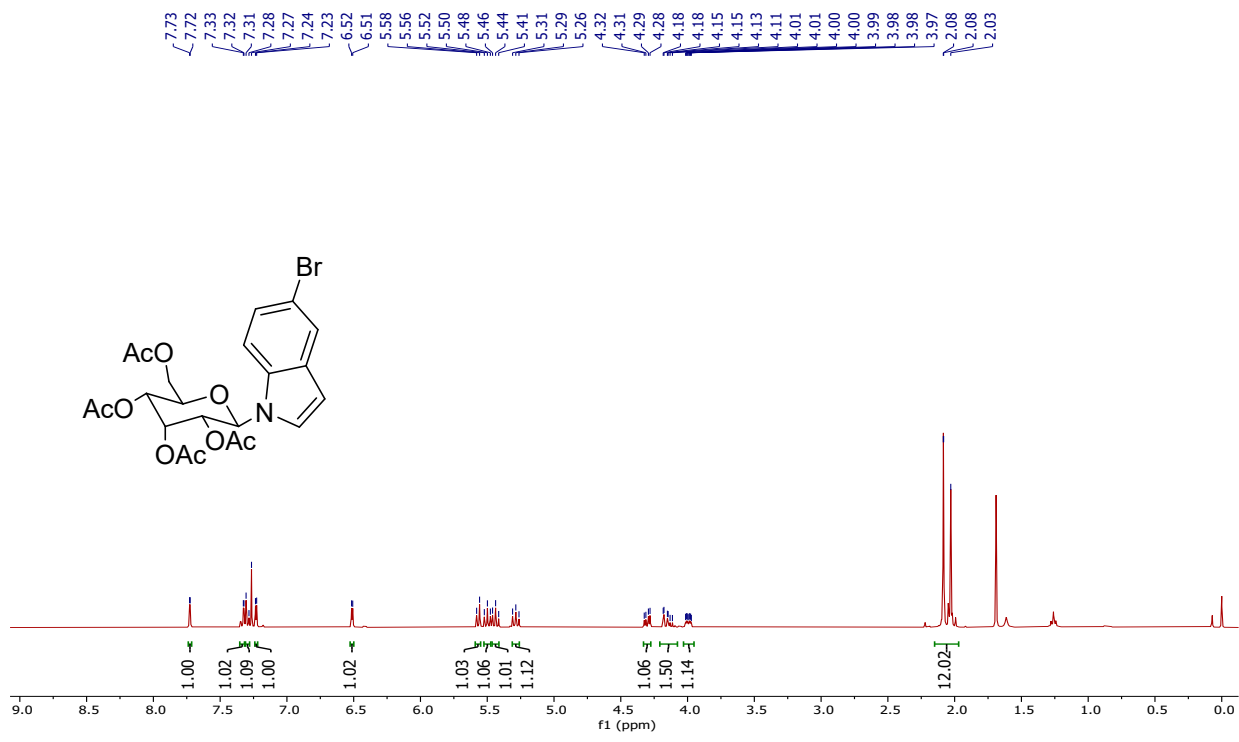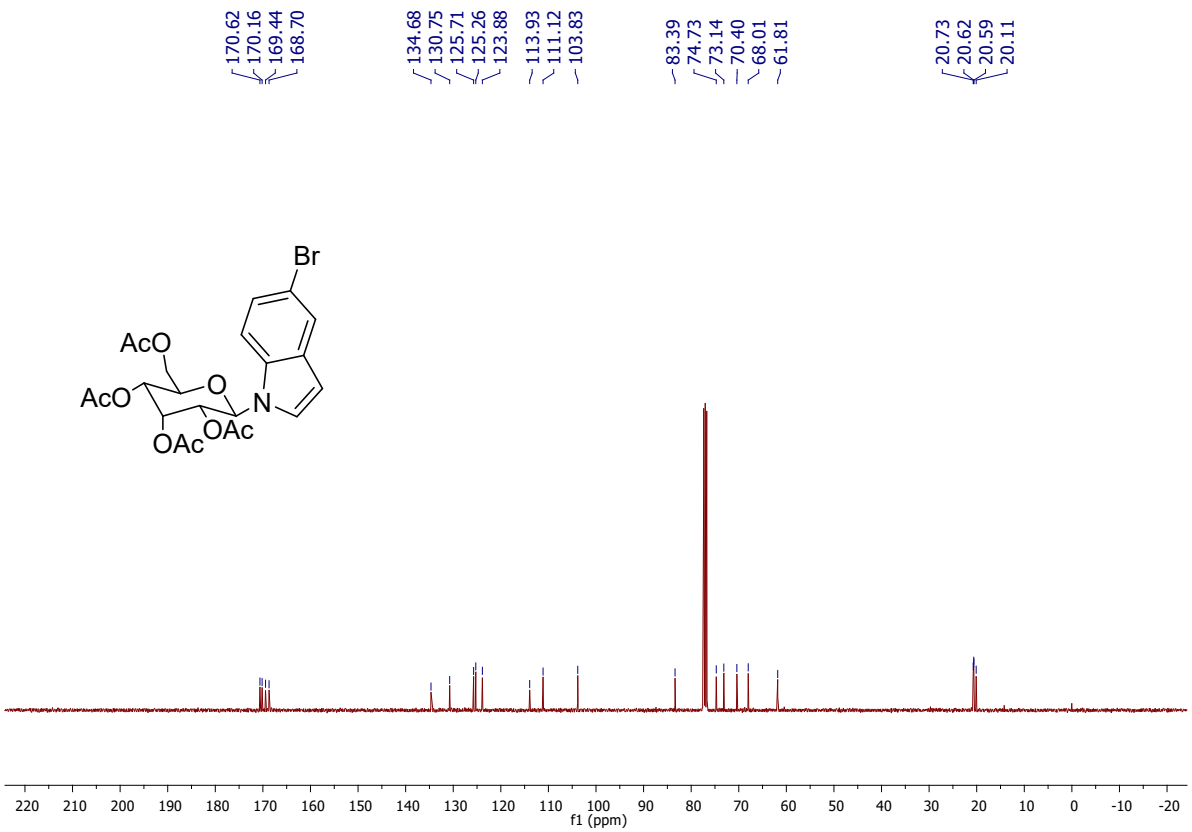

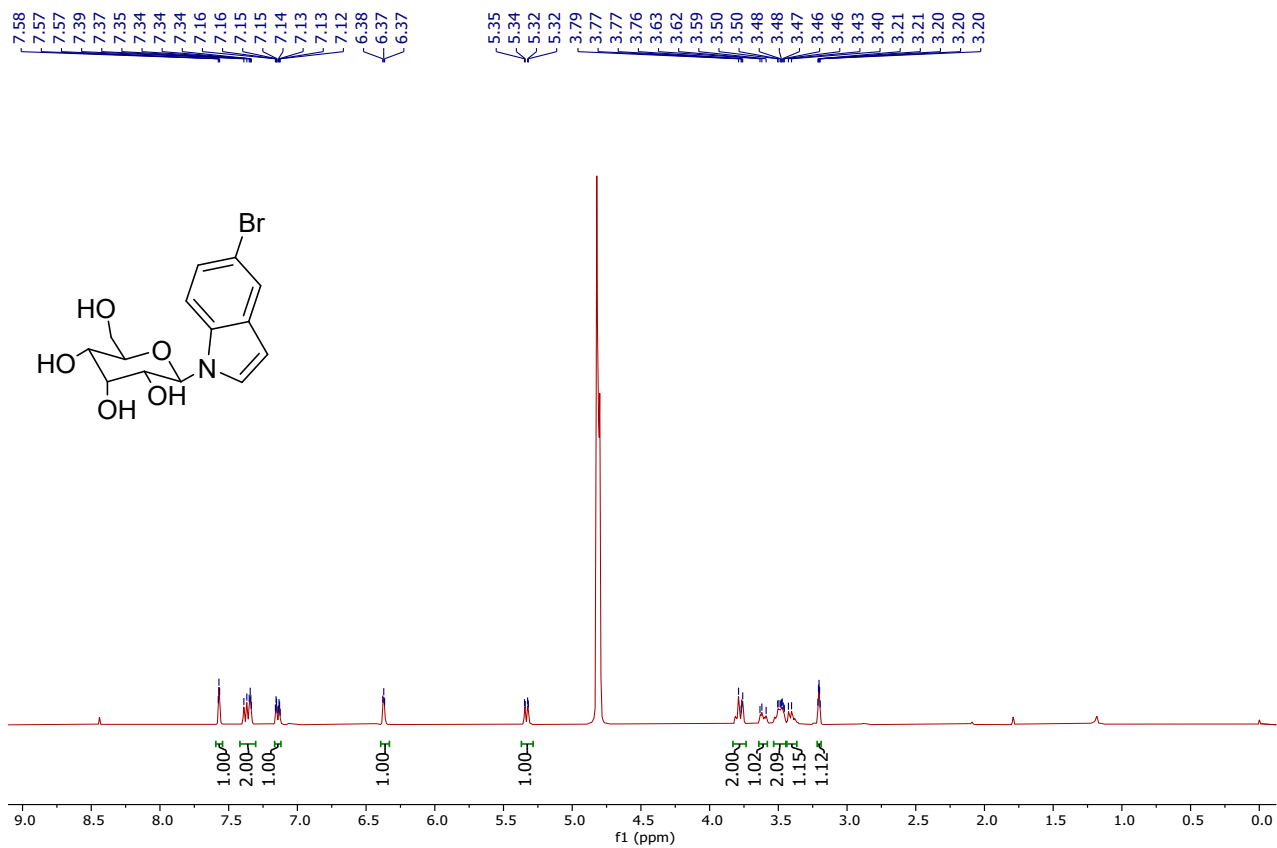

Chemical shifts (ppm) for the spectrum above:

- 135.25
- 130.89
- 126.71
- 124.01
- 122.61
- 112.66
- 111.90
- 101.63
- 85.45
- 79.21
- 77.58
- 72.27
- 69.95
- 61.25

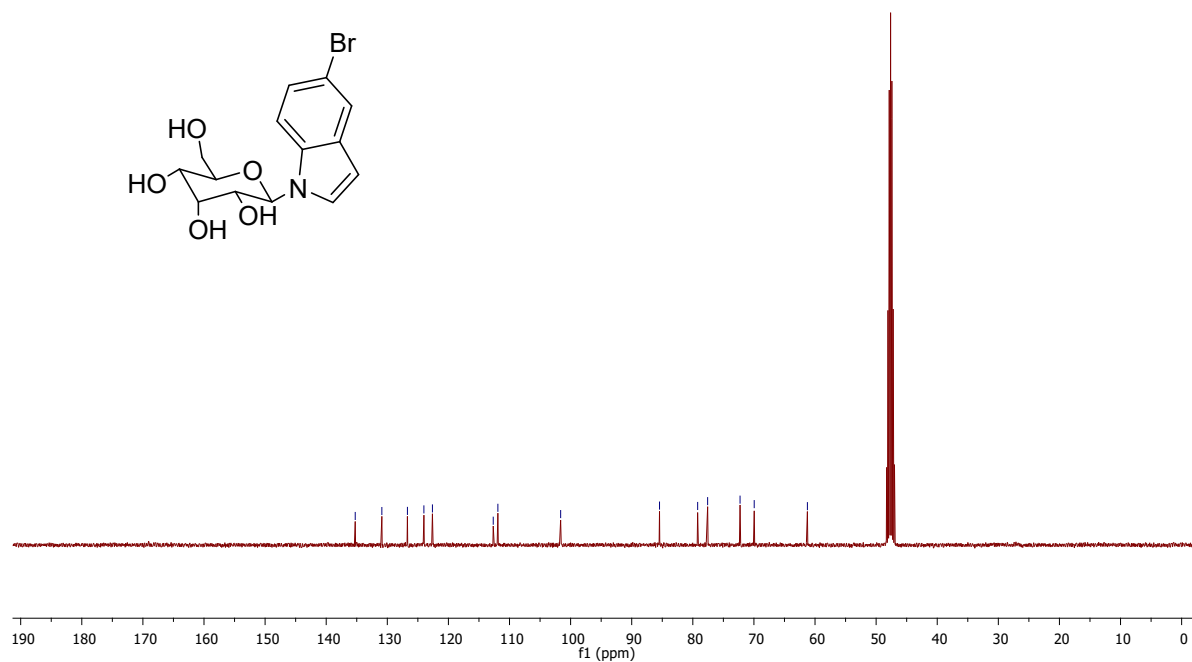

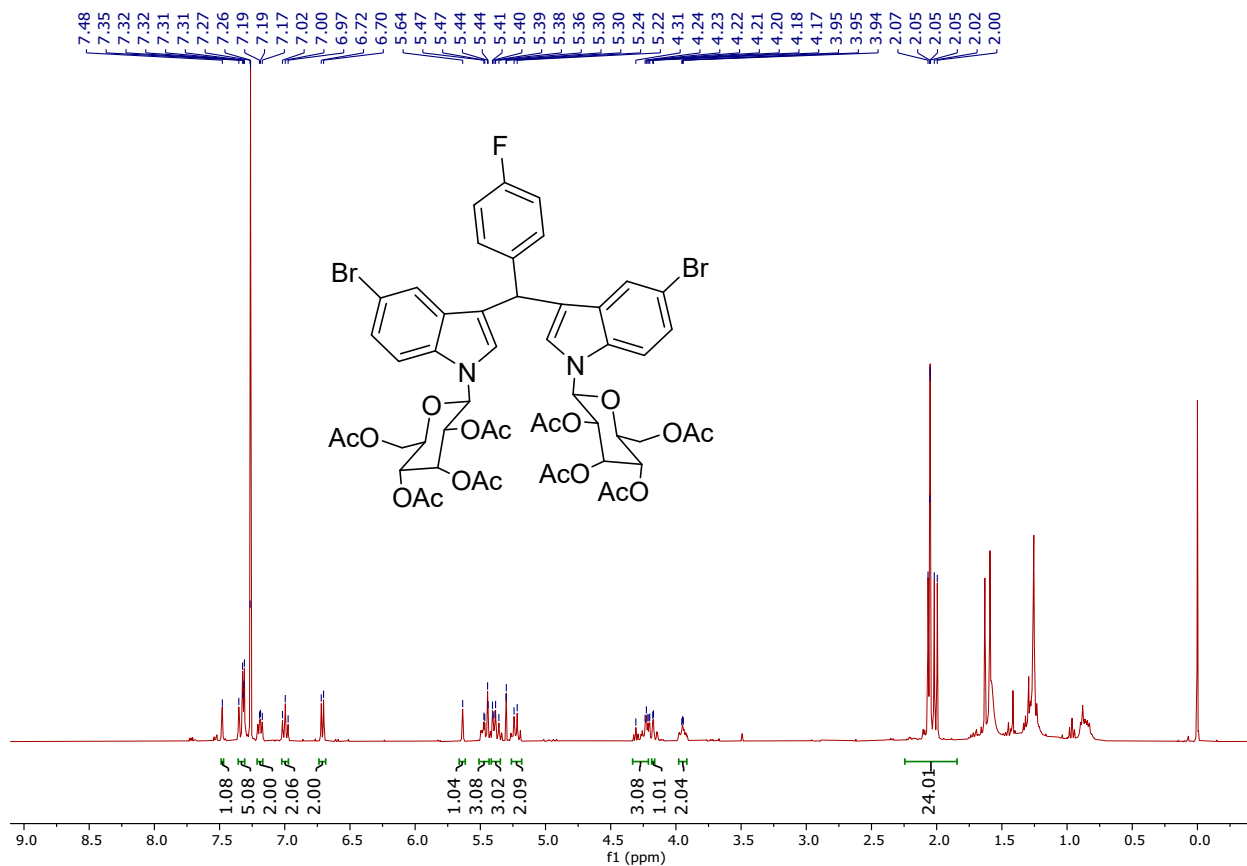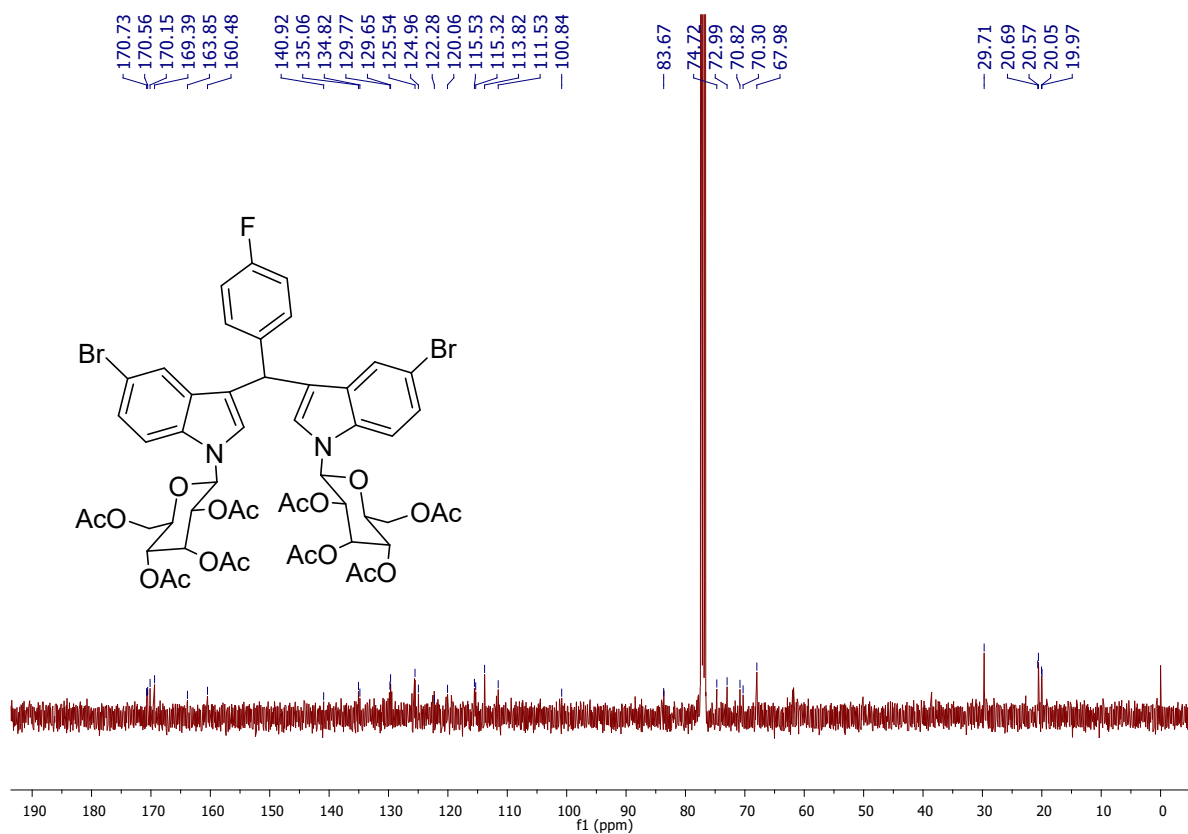

-116.65

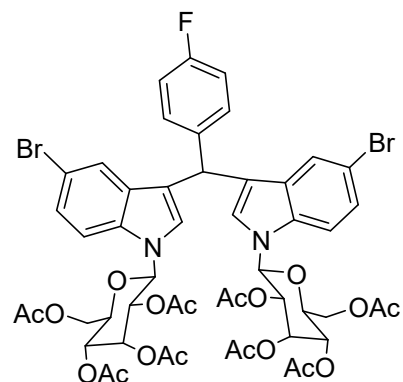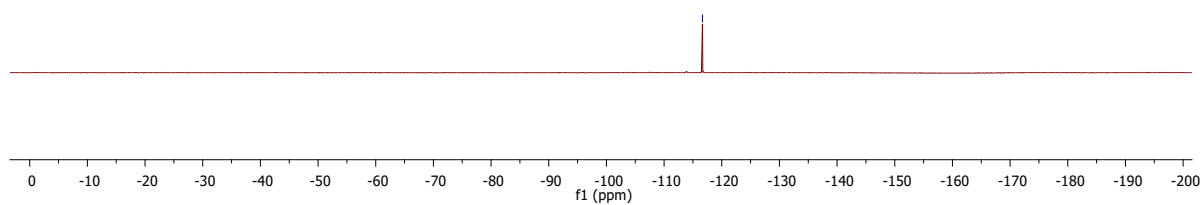

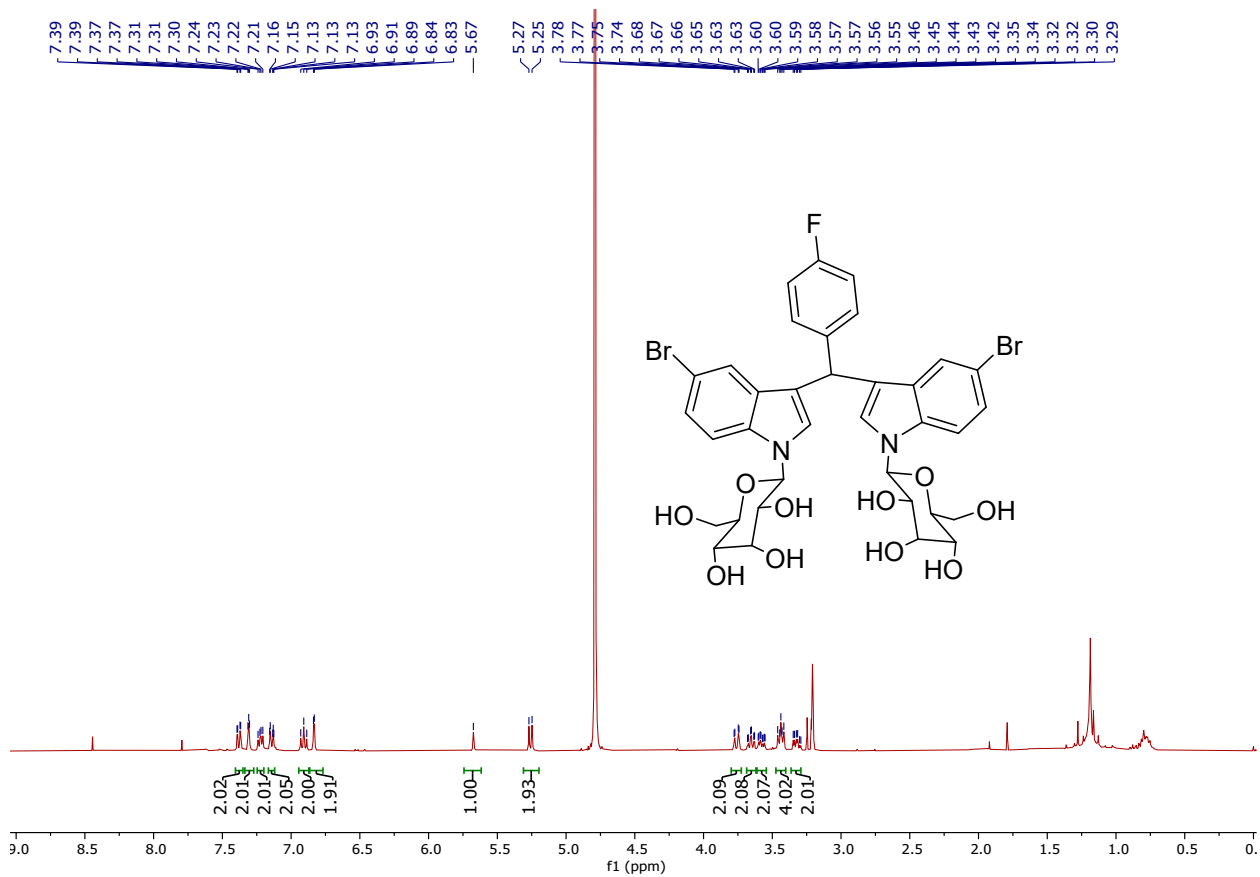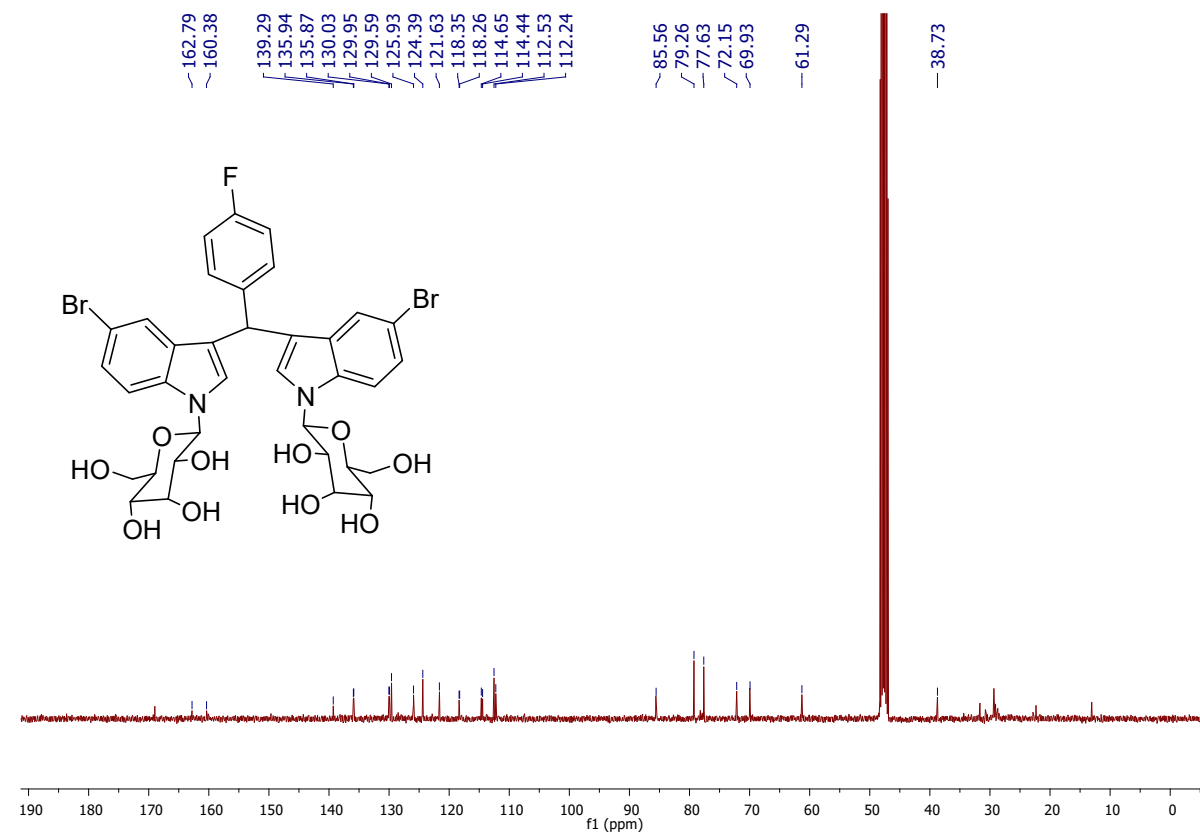

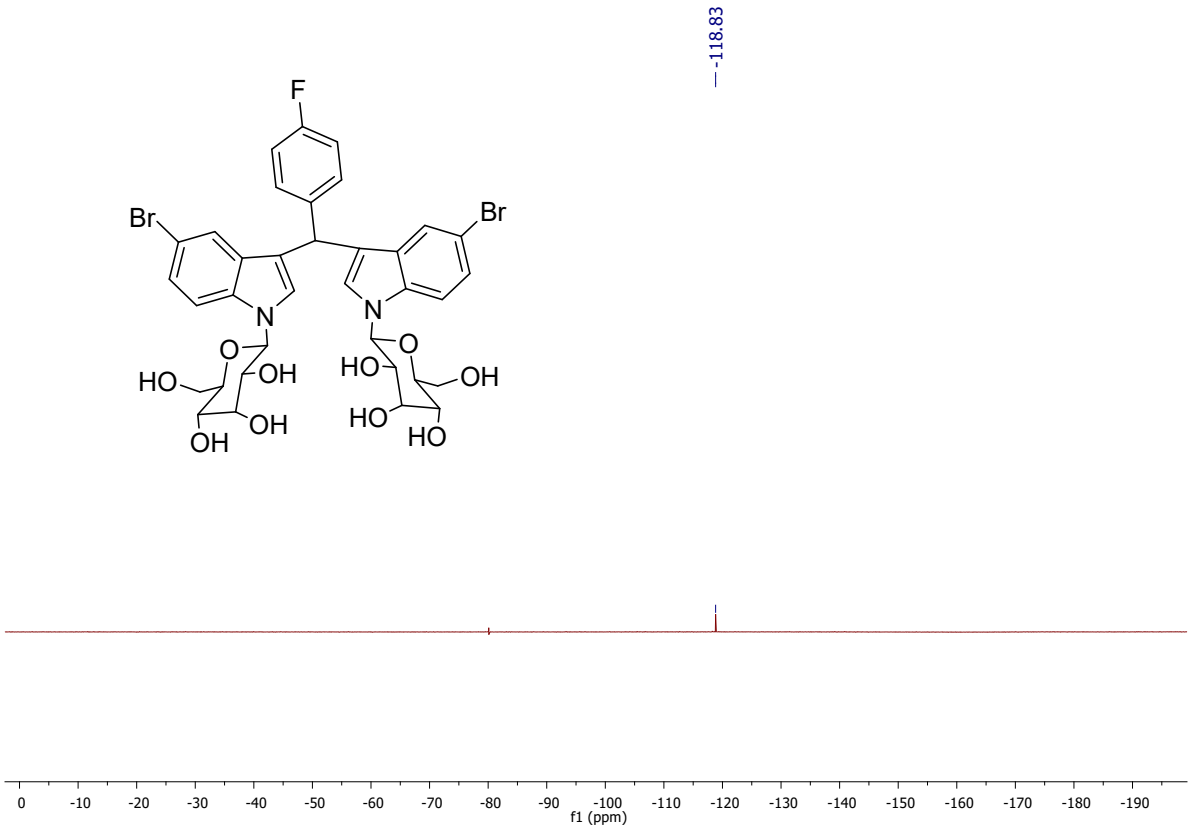

Supplement: d3md00214d1.pdf [file d3md00214d1.pdf]
